# Supplementary material for: Derivation of a fifteen gene prognostic panel for six cancers
Source: PubMed Central journal article supplement (PMC4536526; doi:10.1038/srep13248), 2015-08-14
Supplement: srep13248-s1.pdf [file srep13248-s1.pdf]

## **Supplementary Information**

### **Derivation of a fifteen gene prognostic panel for six cancers**

Mamata F.Khirade<sup>1</sup>, Girdhari Lal, Sharmila A. Bapat<sup>1,2</sup>

<sup>1</sup>National Centre for Cell Science, NCCS Complex, Pune 411007, INDIA

<sup>2</sup>Corresponding author: Sharmila A. Bapat, National Centre for Cell Science, NCCS Complex, Pune 411007, INDIA, Tel.91-020-25708074, email:[sabapat@nccs.res.in](mailto:sabapat@nccs.res.in)

**Running Title: Derivation of GBOCRL-IIPr panel**

Supplementary Figure 1. Flow-chart of analytical approach

Supplementary Data-Fig.1

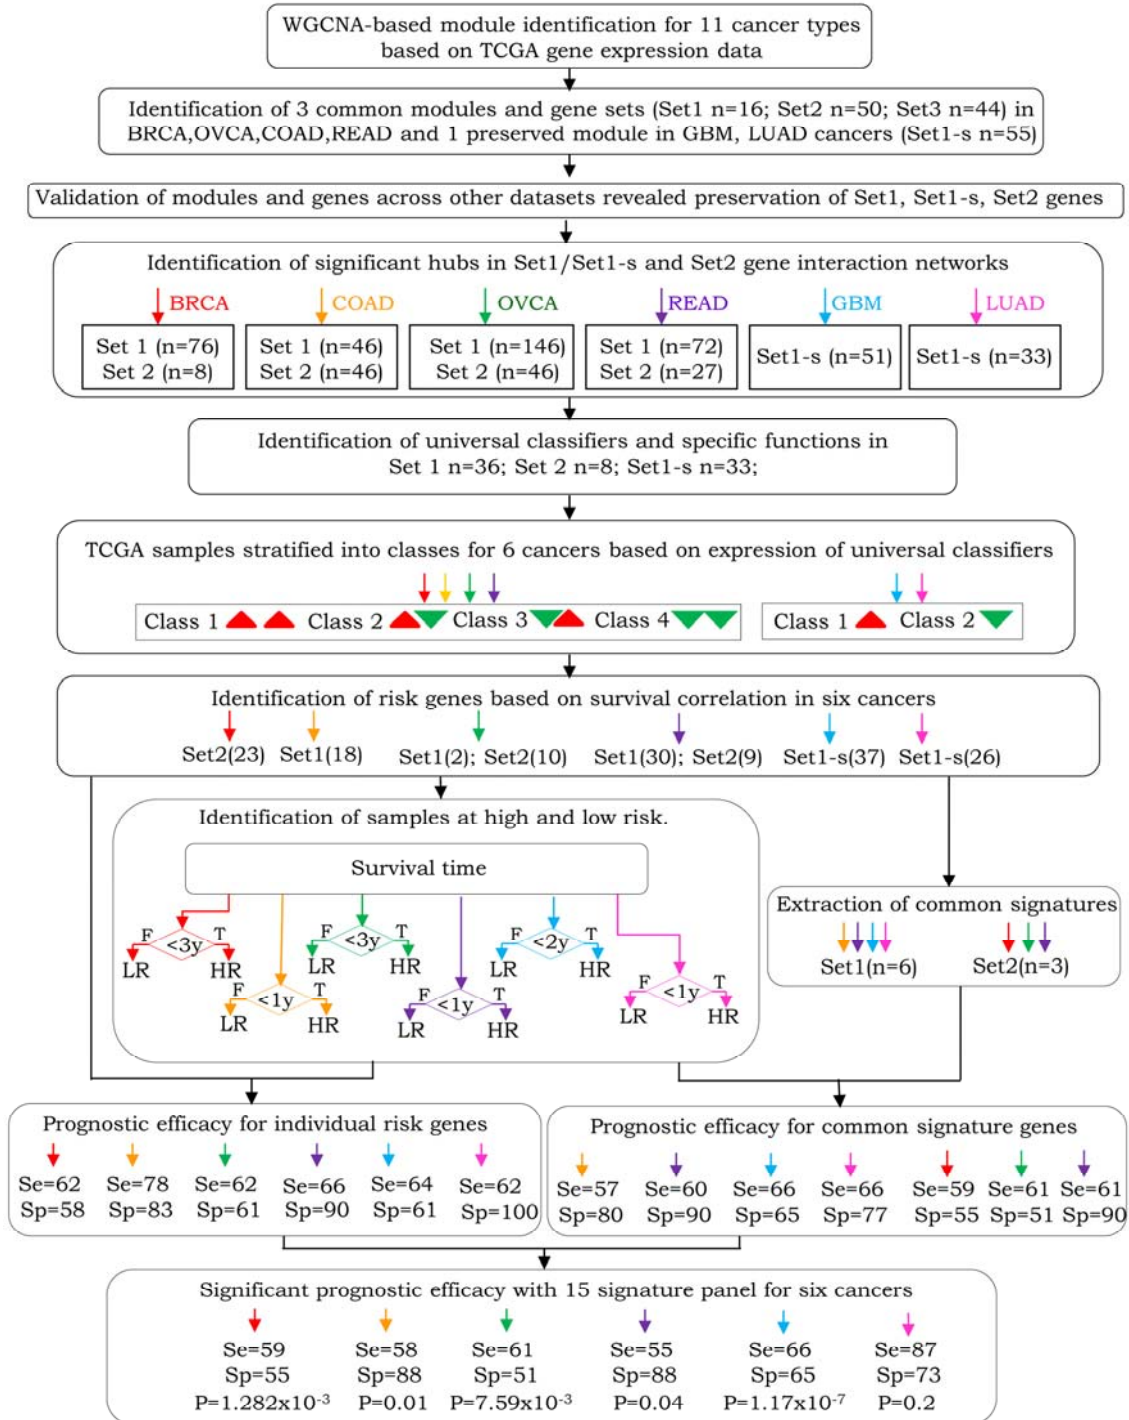

**Supplementary Dataset1. Microarray expression dataset analysis of different cancers for Weighted Gene Co-expression Network Analysis (WGCNA)**

Microarray gene expression data (UNC\_AgilentG4502A\_07) was downloaded from The Cancer Genome Database (TCGA; <https://tcga-data.nci.nih.gov/tcga/>), for 11 cancer types viz. Breast invasive carcinoma (BRCA), Colon Adenocarcinoma (COAD), Glioblastoma multiforme (GBM), Kidney Renal Clear cell Carcinoma (KIRC), Kidney renal papillary cell carcinoma (KIRP), Brain Lower Grade Glioma (LGG), Lung Adenocarcinoma (LUAD), Lung squamous cell carcinoma (LUSC), Ovarian Cystadenocarcinoma (OVCA), Rectum adenocarcinoma (READ), Uterine Corpus Endometrioid carcinoma (UCEC). Median absolute deviation (MAD) analysis was carried out using the Biometric Research Branch tool (BRB;1) to identify statistically significant differentially expressed genes in a tumor-specific manner of a total of 17,814 genes present on the platform. Effectively, this reduced the number of genes being considered in the analysis to a range of 4343 – 7206 genes in the different cancer types (each gene being expressed at a minimum 1.5 fold difference of log<sub>2</sub> intensity values as compared with its median value in at least 20% of samples within a specific cancer type; p<0.05; Supplementary Dataset1-Table1).

**Supplementary Dataset1-Table1. Median Absolute Deviation analysis and WGCNA module identification**

| Cancer Type | No. of samples | No. of differentially expressed genes following MAD analyses | $\beta$ -values of correlation matrix in WGCNA | No. of modules identified in WGCNA |
|-------------|----------------|--------------------------------------------------------------|------------------------------------------------|------------------------------------|
| BRCA        | 599            | 7169                                                         | 12                                             | 10                                 |
| COAD        | 174            | 6541                                                         | 14                                             | 11                                 |
| GBM         | 604            | 7206                                                         | 6                                              | 13                                 |
| KIRC        | 72             | 6173                                                         | 14                                             | 9                                  |
| KIRP        | 16             | 4343                                                         | 14                                             | 23                                 |
| LGG         | 27             | 5356                                                         | 9                                              | 13                                 |
| LUAD        | 32             | 5250                                                         | 9                                              | 18                                 |
| LUSC        | 155            | 6578                                                         | 18                                             | 5                                  |
| OVCA        | 598            | 7046                                                         | 3                                              | 12                                 |
| READ        | 72             | 5886                                                         | 12                                             | 6                                  |
| UCEC        | 54             | 5842                                                         | 20                                             | 9                                  |

We further subjected the differentially expressed gene lists obtained following MAD analysis to weighted gene co-expression Network construction (WGCNA; 2,3). In co-expression networks, nodes represent genes and connection strengths between nodes are determined by pairwise correlations between expression profiles. Connection strengths between two genes in weighted networks use soft thresholding of the Pearson correlation matrix that leads highly robust network construction. In our study, a pair-wise Pearson correlation matrix was computed for each set of differentially expressed genes. Following this, an adjacency matrix was calculated by raising the power of correlation (Beta-  $\beta$  value) that produces a weighted correlation matrix.  $\beta$  values were selected using scale free topology approach ( $r^2$  curve level highest at  $\beta$  value). The adjacency matrix was useful for calculating a network of topological overlap (TO), followed by average linkage hierarchical clustering of genes using TO as input. Network modules (clusters of highly co-expressed genes) were identified for each cancer types (Supplementary Dataset1-Table1).

## References

1. Simon R, Lam A, Li MC, Ngan M, Menezes S, Zhao, Y. Analysis of gene expression data using BRB-ArrayTools. *Cancer Inform* 2007;3:11-17.
2. Langfelder P, Horvath S. WGCNA: an R package for weighted correlation network analysis. *BMC.Bioinformatics* 2008;9:559.
3. Ghazalpour A, Doss S, Zhang B, Wang S, Plaisier C, Castellanos R, et al. Integrating genetic and network analysis to characterize genes related to mouse weight. *PLoS.Genet* 2006;2:e130.

**Supplementary Dataset2. Module preservation statistics and Identification of conserved genes**

**Supplementary Dataset2-Table1. Summary matrix indicating module preservation through stability of gene co-expression across 11 cancer types**

| Cancer Type | BRCA | COAD | GBM | KIRC | KIRP | LGG | LUAD | LUSC | OVCA | READ | UCEC |
|-------------|------|------|-----|------|------|-----|------|------|------|------|------|
| BRCA        | 10   | 5    | 3   | 2    | 1    | 2   | 4    | 0    | 4    | 4    | 0    |
| COAD        | 5    | 11   | 3   | 2    | 1    | 2   | 3    | 0    | 4    | 6    | 0    |
| GBM         | 3    | 3    | 13  | 3    | 1    | 4   | 4    | 1    | 7    | 2    | 0    |
| KIRC        | 2    | 2    | 3   | 9    | 1    | 1   | 2    | 0    | 2    | 2    | 0    |
| KIRP        | 1    | 1    | 1   | 1    | 23   | 1   | 2    | 0    | 1    | 1    | 0    |
| LGG         | 2    | 2    | 4   | 1    | 1    | 13  | 2    | 0    | 2    | 1    | 0    |
| LUAD        | 4    | 3    | 4   | 2    | 2    | 2   | 18   | 0    | 5    | 2    | 0    |
| LUSC        | 0    | 0    | 1   | 0    | 0    | 0   | 0    | 5    | 0    | 0    | 2    |
| OVCA        | 4    | 4    | 7   | 2    | 1    | 2   | 5    | 0    | 9    | 3    | 0    |
| READ        | 4    | 6    | 2   | 2    | 1    | 1   | 2    | 0    | 3    | 12   | 0    |
| UCEC        | 0    | 0    | 0   | 0    | 0    | 0   | 0    | 2    | 0    | 0    | 6    |

**Module comparison identifies specific sets of conserved genes across strongly and moderately preserved cancers respectively**

Genes conserved across modules were identified using cross-tabulation based module preservation statistics (Supplementary Dataset2-Fig.1). This contingency table indicated the high agreement between strongly preserved cancers BRCA, COAD, OVCA and READ and identifies three sets of modules that are strongly correlative between these cancers, while one module is moderately preserved in GBM and LUAD (Supplementary Dataset2-Tables 2,3). Further, within each of the three strongly conserved modules a group of preserved genes were identified and termed as Set1 (n=161) and Set2 (n=50) genes. Similarly within the moderately conserved module, a subset of Set1 genes (referred to as Set1-s,n=55) was identified as being preserved.

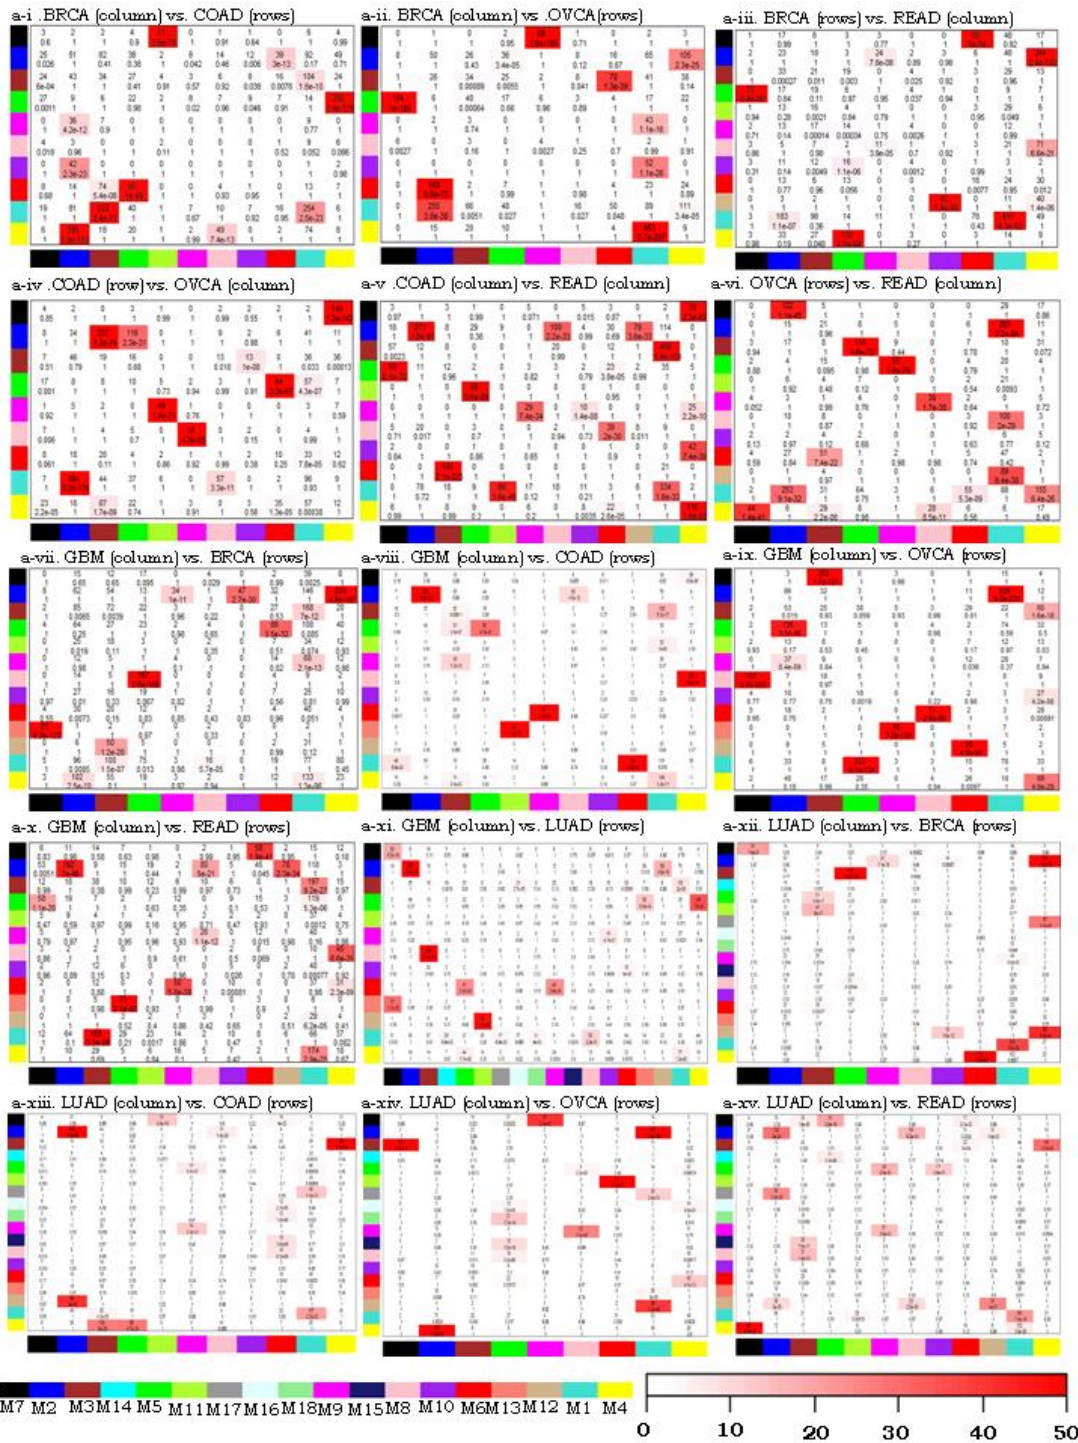

**Supplementary Dataset2-Fig.1. Cross-tabulation based comparison of modules (defined as clusters) for 6 cancer networks represented as Contingency tables for comparison of - a-i,a-ii,a-iii. BRCA with COAD, OVCA and READ modules; a-iv,a-v. COAD with OVCA and READ modules; a-vi. OVCA modules with READ modules; a-vii,a-xi. GBM with BRCA, COAD, OVCA, READ and LUAD modules; a-xii,a-xv. LUAD with BRCA, COAD, OVCA and READ modules.**

**Supplementary Dataset2-Table2. Preservation of genes across corresponding modules between 6 cancer types (4 strongly and 2 moderately preserved cancers)**

| Strong preservation    |             |             |             | Moderate preservation |             |            |            |
|------------------------|-------------|-------------|-------------|-----------------------|-------------|------------|------------|
| Comparison             | Set1 genes  | Set2 genes  | Set3 genes  | Comparison            | Set1 genes  | Set2 genes | Set3 genes |
| BRCA vs. COAD          | 395 (M4-M2) | 95 (M6-M5)  | 51 (M7-M11) | GBM vs. BRCA          | 334 (M2-M4) | -          | -          |
| BRCA vs. OVCA          | 463 (M4-M1) | 168 (M6-M2) | 68 (M7-M9)  | GBM vs. COAD          | 393 (M2-M2) | -          | -          |
| BRCA vs. READ          | 75 (M7-M5)  | 89 (M6-M7)  | 244 (M4-M2) | GBM vs. OVCA          | 536 (M2-M1) | -          | -          |
| COAD vs. OVCA          | 484 (M2-M1) | 116 (M5-M2) | 49 (M11-M9) | GBM vs. READ          | 192 (M2-M2) | -          | -          |
| COAD vs. READ          | 98 (M5-M7)  | 273 (M2-M2) | 60 (M11-M5) | GBM vs. LUAD          | 270 (M2-M2) | -          | -          |
| OVCA vs. READ          | 122 (M2-M7) | 65 (M9-M5)  | 263 (M1-M2) | LUAD vs. COAD         | 243 (M2-M2) | -          | -          |
|                        |             |             |             | LUAD vs. OVCA         | 302 (M2-M1) | -          | -          |
|                        |             |             |             | LUAD vs. BRCA         | 239 (M2-M4) | -          | -          |
|                        |             |             |             | LUAD vs. READ         | -           | -          | -          |
| <b>Signature genes</b> | <b>161</b>  | <b>50</b>   | <b>44</b>   | <b>-</b>              | <b>55</b>   | <b>-</b>   | <b>-</b>   |

**Supplementary Dataset2-Table3. Identification of universal signature genes**

| Strong module preservation signature |            |            | Moderate module preservation signature |            |            |
|--------------------------------------|------------|------------|----------------------------------------|------------|------------|
| Set1 genes                           | Set2 genes | Set3 genes | Set1-s genes                           | Set2 genes | Set3 genes |
| <b>161</b>                           | <b>50</b>  | <b>44</b>  | <b>55</b>                              | <b>-</b>   | <b>-</b>   |
| ACP5                                 | ADAM12     | AVP        | AIF1                                   |            |            |
| ADAM8                                | BGN        | BHLHB4     | APOBEC3A                               |            |            |
| AIF1                                 | CDH11      | CACNA1E    | APOBEC3G                               |            |            |
| AMICA1                               | COL10A1    | CAMK2N2    | ARHGAP30                               |            |            |
| APOBEC3A                             | COL11A1    | CASKIN1    | ARHGAP9                                |            |            |
| APOBEC3G                             | COL12A1    | CDC42EP5   | BTK                                    |            |            |
| APOBEC3H                             | COL1A1     | CDH24      | CD33                                   |            |            |
| ARHGAP15                             | COL1A2     | COX6A2     | CD37                                   |            |            |
| ARHGAP30                             | COL3A1     | DLGAP3     | CD53                                   |            |            |
| ARHGAP9                              | COL5A1     | EN2        | CD69                                   |            |            |
| ARHGDIB                              | COL5A2     | FBXL17     | CD86                                   |            |            |
| BTK                                  | COL6A3     | FCRLB      | CLEC4A                                 |            |            |
| CCL17                                | COL8A1     | FOXB1      | CYBB                                   |            |            |
| CCL19                                | CORIN      | GALR3      | EBI2                                   |            |            |
| CCL5                                 | CTHRC1     | GP1BB      | EVI2B                                  |            |            |
| CCR1                                 | CTSK       | GPR150     | FCGR1A                                 |            |            |
| CCR2                                 | DIO2       | GPR153     | FCGR2B                                 |            |            |
| CCR7                                 | EDNRA      | GPR156     | FCGR3A                                 |            |            |
| CD2                                  | F2R        | GPR78      | FYB                                    |            |            |
| CD247                                | FAP        | GRIN2D     | HAVCR2                                 |            |            |
| CD27                                 | INHBA      | HES7       | HCLS1                                  |            |            |
| CD28                                 | ITGA11     | IFITM5     | IFI30                                  |            |            |
| CD33                                 | ITGBL1     | KISS1R     | IL411                                  |            |            |
| CD37                                 | LOXL2      | LCE1D      | ITGB2                                  |            |            |
| CD38                                 | LRRC15     | LCE2D      | KLHDC7B                                |            |            |
| CD3D                                 | MMP11      | LCE5A      | LAIR1                                  |            |            |
| CD3G                                 | MXRA5      | MAFA       | LAPTM5                                 |            |            |
| CD40                                 | NID2       | MMP17      | LCP1                                   |            |            |
| CD48                                 | NOX4       | MYOD1      | LCP2                                   |            |            |
| CD5                                  | P4HA3      | NEUROG3    | LILRB1                                 |            |            |
| CD52                                 | POSTN      | NLF2       | LPXN                                   |            |            |
| CD53                                 | PPAPDC1A   | NPBWR1     | LY86                                   |            |            |
| CD69                                 | PPEF1      | OR5L1      | MNDA                                   |            |            |
| CD72                                 | PRR16      | OTUD7A     | NCF2                                   |            |            |
| CD74                                 | PRRX1      | PCSK1N     | NCKAP1L                                |            |            |
| CD86                                 | RCN3       | PHOX2A     | NPL                                    |            |            |
| CD96                                 | SGIP1      | POU3F3     | P2RY6                                  |            |            |

|         |        |           |          |  |  |
|---------|--------|-----------|----------|--|--|
| CHST11  | SHOX2  | psiTPTE22 | PLEK     |  |  |
| CLC     | SPARC  | RHBDL1    | PSCDBP   |  |  |
| CLEC12A | SPOCD1 | SCRT2     | PTAFR    |  |  |
| CLEC4A  | SPON2  | SOX18     | PTPRC    |  |  |
| CORO1A  | THBS2  | TIP39     | RAB42    |  |  |
| CRTAM   | THY1   | UTS2R     | RGS18    |  |  |
| CST7    | TMEM46 | ZSCAN10   | RNASE6   |  |  |
| CTSL1   | TNFSF4 |           | SAMSN1   |  |  |
| CYBB    | VCAN   |           | SIGLEC5  |  |  |
| DOCK8   | WISP1  |           | SIGLEC7  |  |  |
| DOK3    | WNT2   |           | SLA      |  |  |
| DPEP2   | ZNF469 |           | SLC37A2  |  |  |
| EBI2    | CHSY-2 |           | SUCNR1   |  |  |
| EDG6    |        |           | TLR1     |  |  |
| EOMES   |        |           | VMO1     |  |  |
| EVI2A   |        |           | VNN2     |  |  |
| EVI2B   |        |           | HLA-DQB1 |  |  |
| FCGR1A  |        |           | HLA-DRB5 |  |  |
| FCGR2B  |        |           |          |  |  |
| FCGR3A  |        |           |          |  |  |
| FYB     |        |           |          |  |  |
| GFI1    |        |           |          |  |  |
| HAVCR2  |        |           |          |  |  |
| HCLS1   |        |           |          |  |  |
| HCST    |        |           |          |  |  |
| HPSE    |        |           |          |  |  |
| ICAM1   |        |           |          |  |  |
| ICOS    |        |           |          |  |  |
| IFI16   |        |           |          |  |  |
| IFI30   |        |           |          |  |  |
| IGHM    |        |           |          |  |  |
| IGKC    |        |           |          |  |  |
| IKZF1   |        |           |          |  |  |
| IL21R   |        |           |          |  |  |
| IL2RB   |        |           |          |  |  |
| IL41    |        |           |          |  |  |
| IL7R    |        |           |          |  |  |
| IRAK3   |        |           |          |  |  |
| ITGA4   |        |           |          |  |  |
| ITGB2   |        |           |          |  |  |
| ITK     |        |           |          |  |  |
| JAK2    |        |           |          |  |  |
| JAKMIP1 |        |           |          |  |  |
| KLHDC7B |        |           |          |  |  |
| KLHL6   |        |           |          |  |  |
| KLRC1   |        |           |          |  |  |
| LAG3    |        |           |          |  |  |
| LAIR1   |        |           |          |  |  |
| LAMP3   |        |           |          |  |  |
| LAPTM5  |        |           |          |  |  |
| LCK     |        |           |          |  |  |
| LCP1    |        |           |          |  |  |
| LCP2    |        |           |          |  |  |
| LILRB1  |        |           |          |  |  |
| LILRB3  |        |           |          |  |  |
| LPXN    |        |           |          |  |  |
| LRRRC8C |        |           |          |  |  |
| LTB     |        |           |          |  |  |
| LY86    |        |           |          |  |  |
| MMP9    |        |           |          |  |  |
| MNDA    |        |           |          |  |  |
| NCF2    |        |           |          |  |  |
| NCF4    |        |           |          |  |  |
| NCKAP1L |        |           |          |  |  |
| NPL     |        |           |          |  |  |
| P2RY10  |        |           |          |  |  |
| P2RY6   |        |           |          |  |  |
| PARVG   |        |           |          |  |  |
| PDCD1   |        |           |          |  |  |
| PIK3CG  |        |           |          |  |  |



|              |  |  |  |  |  |
|--------------|--|--|--|--|--|
| PKD2L1       |  |  |  |  |  |
| PLA2G7       |  |  |  |  |  |
| PLEK         |  |  |  |  |  |
| PRKCB1       |  |  |  |  |  |
| PSCD4        |  |  |  |  |  |
| PSCDBP       |  |  |  |  |  |
| PSTPIP1      |  |  |  |  |  |
| PTAFR        |  |  |  |  |  |
| PTPN22       |  |  |  |  |  |
| PTPRC        |  |  |  |  |  |
| PTPRCAP      |  |  |  |  |  |
| PVRIG        |  |  |  |  |  |
| RAB42        |  |  |  |  |  |
| RAC2         |  |  |  |  |  |
| RASSF4       |  |  |  |  |  |
| Rgr          |  |  |  |  |  |
| RGS1         |  |  |  |  |  |
| RGS18        |  |  |  |  |  |
| RNASE6       |  |  |  |  |  |
| SAMSN1       |  |  |  |  |  |
| SELPLG       |  |  |  |  |  |
| SH2D1A       |  |  |  |  |  |
| SIGLEC5      |  |  |  |  |  |
| SIGLEC7      |  |  |  |  |  |
| SIT1         |  |  |  |  |  |
| SLA          |  |  |  |  |  |
| SLAMF7       |  |  |  |  |  |
| SLC15A3      |  |  |  |  |  |
| SLC37A2      |  |  |  |  |  |
| SLFN11       |  |  |  |  |  |
| SP140        |  |  |  |  |  |
| SUCNR1       |  |  |  |  |  |
| TAGAP        |  |  |  |  |  |
| TBC1D10C     |  |  |  |  |  |
| TBX21        |  |  |  |  |  |
| TLR1         |  |  |  |  |  |
| TMEM149      |  |  |  |  |  |
| TNFSF13B     |  |  |  |  |  |
| TRAF3IP3     |  |  |  |  |  |
| TRAT1        |  |  |  |  |  |
| TRIM22       |  |  |  |  |  |
| TRPV2        |  |  |  |  |  |
| URP2         |  |  |  |  |  |
| VAV1         |  |  |  |  |  |
| VMO1         |  |  |  |  |  |
| VNN2         |  |  |  |  |  |
| WDFY4        |  |  |  |  |  |
| XCL2         |  |  |  |  |  |
| ZNF683       |  |  |  |  |  |
| HLA-DPB1     |  |  |  |  |  |
| HLA-DQB1     |  |  |  |  |  |
| HLA-DRB5     |  |  |  |  |  |
| IGKV1-5      |  |  |  |  |  |
| RP5-821D11.2 |  |  |  |  |  |

**Supplementary Dataset3. Validation of Module preservation across additional gene expression datasets of six cancer types**

The following expression datasets available in the public domain (Gene Expression Omnibus-GEO; <http://www.ncbi.nlm.nih.gov/geo>) were used to identify robustness of network module across validation datasets (Supplementary Dataset3-Table1).

**Supplementary Dataset3-Table1. Datasets used for validation of individual cancer network modules across different platforms**

| SR.NO       | PLATFORM                                              | DATASET RECORD | SAMPLE SIZE | REF.     |
|-------------|-------------------------------------------------------|----------------|-------------|----------|
| <b>BRCA</b> |                                                       |                |             |          |
| BRCA-VD1    | Affymetrix Human Genome U133 Plus 2.0 Array           | GDS4114        | 24          | GSE26910 |
| BRCA-VD2    | Affymetrix Human Genome U133A Array                   | GDS4057        | 103         | GSE22093 |
| BRCA-VD3    | Affymetrix Human Genome U133A Array                   | GDS4056        | 61          | GSE23988 |
| BRCA-VD4    | Affymetrix Human Genome U133 Plus 2.0 Array           | GDS3853        | 19          | GSE21422 |
| BRCA-VD5    | Affymetrix Human Genome U133A Array                   | GDS3097        | 48          | GSE5847  |
| BRCA-VD6    | Affymetrix Human Genome HG-U133A Array                | GDS3096        | 47          | GSE5847  |
| BRCA-VD7    | Affymetrix Human Genome U133 Plus 2.0 Array           | GDS2635        | 30          | GSE5764  |
| <b>COAD</b> |                                                       |                |             |          |
| COAD-VD1    | Affymetrix Human Genome U133 Plus 2.0 Array           | GDS4379        | 62          | GSE35896 |
| COAD-VD2    | Affymetrix Human Genome U133 Plus 2.0 Array           | GDS4296        | 174         | GSE32474 |
| COAD-VD3    | ABI Human Genome Survey Microarray Version 2          | GDS3756        | 42          | GSE15781 |
| COAD-VD4    | Affymetrix Human Genome U95 Version 2 Array           | GDS3384        | 23          | GSE11237 |
| <b>OVCA</b> |                                                       |                |             |          |
| OVCA-VD1    | Affymetrix Human Genome HG-U133A Array Plus 2.0 Array | GDS3592        | 24          | GSE14407 |
| OVCA-VD2    | Affymetrix Human Genome HG_U95Av2 Version 2 Array     | GDS2785        | 43          | GSE7463  |
| OVCA-VD3    | Affymetrix Human Genome HG_U95Av2 Version 2 Array     | GDS1381        | 18          | GSE1926  |
| <b>READ</b> |                                                       |                |             |          |
| READ-VD1    | ABI Human Genome Survey Microarray Version 2          | GDS3756        | 42          | GSE15781 |
| READ-VD2    | Affymetrix Human Genome HG-U133A Array Plus 2.0 Array | GDS4396        | 29          | GSE28702 |
| READ-VD3    | Affymetrix Human Genome HG-U133A Array Plus 2.0 Array | GDS4393        | 54          | GSE28702 |
| <b>GBM</b>  |                                                       |                |             |          |
| GBM-VD1     | Affymetrix Human Genome HG-U133A Array Plus 2.0 Array | GDS4467        | 35          | GSE15824 |
| GBM-VD2     | Affymetrix Human Genome HG-U133A Array Plus 2.0 Array | GDS3885        | 92          | GSE23806 |
| GBM-VD3     | Affymetrix Human Genome HG-U133A Array                | GDS1975        | 85          | GSE4412  |
| GBM-VD4     | Affymetrix Human Genome HG-U133A Array Plus 2.0 Array | GDS1962        | 180         | GSE4290  |
| <b>LUAD</b> |                                                       |                |             |          |
| GBM-VD1     | Affymetrix Human Genome HG-U133A Array Plus 2.0 Array | GDS3257        | 58          | GSE10072 |

Normalised data were subjected to Median Absolute Deviation (MAD) analysis to obtain significant differentially expressed genes (each expressing a minimum 1.5 fold difference with its median value in at least 20% of samples at log intensity variation  $p < 0.05$ ). WGCNA-based network modules were identified as described in Expanded View Dataset1. Such clustering of co-expressed genes revealed different numbers of modules in each cancer type (Supplementary Dataset3-Table2; Supplementary Dataset3-Fig.1).

**Supplementary Dataset3-Table2. Network module identification in the validation datasets**

| Validation datasets | Output genes after MAD Analyses | $\beta$ values of correlation matrix | Number of Modules | Strongly Validated modules | Moderately Validated modules |
|---------------------|---------------------------------|--------------------------------------|-------------------|----------------------------|------------------------------|
| BRCA-VD1            | 6262                            | 14                                   | 18                | M4,M6                      | M1,M2,M3,M8,M9,M10           |
| BRCA-VD2            | 6569                            | 10                                   | 8                 | M1,M3,M4,M6                | M2,M5,M9,M10                 |
| BRCA-VD3            | 6382                            | 10                                   | 10                | M2,M3,M4,M10               | M1,M5,M6,M8,M9               |
| BRCA-VD4            | 5599                            | 20                                   | 12                | M1,M4,M5                   | M2,M3,M6,M8,M9,M10           |
| BRCA-VD5            | 4636                            | 12                                   | 15                | M1,M3,M4,M5, M6, M10       | M2,M8,M9                     |
| BRCA-VD6            | 3706                            | 10                                   | 11                | M1,M3,M4,M5,M6, M10        | M2,M8,M9                     |
| BRCA-VD7            | 7315                            | 8                                    | 25                | M1,M2,M6                   | M3,M4,M5,M9,M10              |
| COAD-VD1            | 5470                            | 6                                    | 11                | M2,M3,M4,M5                | M7,M8,M10                    |
| COAD-VD 2           | 5203                            | 9                                    | 12                | M3,M4                      | M2,M5,M6,M10                 |
| COAD-VD 3           | 4832                            | 16                                   | 7                 | M3,M4,M5                   | M1,M2,M7,M8                  |
| COAD-VD 4           | 2876                            | 14                                   | 10                | M2,M3                      | M1,M4,M5,M6,M7,M8            |
| OVCA-VD1            | 4414                            | 20                                   | 6                 | -                          | M2,M3,M7                     |
| OVCA-VD2            | 3766                            | 20                                   | 6                 | M1,M7                      | M2,M4,M5,M6                  |
| OVCA-VD3            | 3784                            | 4                                    | 10                | M7                         | M1,M2                        |
| READ-VD1            | 5010                            | 10                                   | 7                 | M1,M7                      | M2,M4,M6,M10,M11             |
| READ-VD2            | 7095                            | 4                                    | 25                | M2                         | M1,M4,M6,M7,M8,M9, M11, M12  |
| READ-VD3            | 4329                            | 9                                    | 9                 | M1,M7                      | M2,M6,M8,M11,12              |
| GBM-VD1             | 4943                            | 20                                   | 11                | M2,M3,M4,M5, M8, M11       | M10,M12,M13                  |
| GBM-VD2             | 1977                            | 20                                   | 4                 | M4,M8                      | M1,M2,M5,M6,M9,M10           |
| GBM-VD3             | 6685                            | 14                                   | 8                 | M2,M3,M4,M5, M8, M11       | M6,M10                       |
| GBM-VD4             | 100053                          | 14                                   | 8                 | M2,M3,M5,M8, M11           | M4,M7,M10                    |
| LUAD-VD1            | 4752                            | 8                                    | 8                 | M2,M3,M4,M12               | M1,M13,M14,M17               |

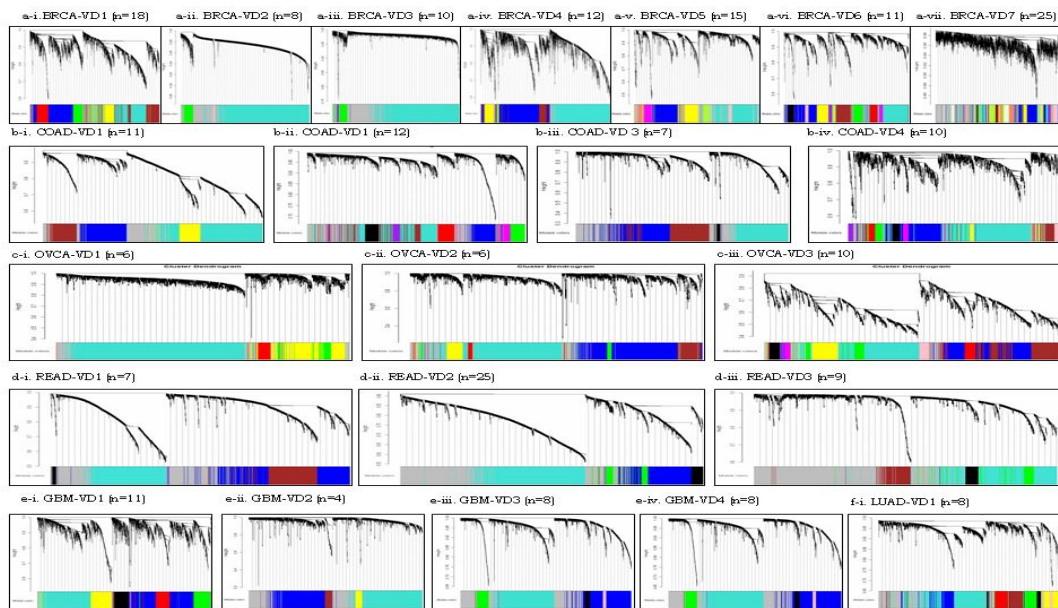

**Supplementary Dataset3-Fig.1. Cluster dendrograms validation datasets, a-i-a-vii. BRCA-VD1 to BRCA-VD7, b-i-b-iv. COAD-VD1 to COAD-VD4, c-i-c-iii. OVCA-VD1 to OVCA-VD3,d-i-d-iii. 3 READ-VD1 to READ-VD3, e-i-e-iv. GBM-VD1 to GBM-VD3, f-i. LUAD-VD1; each dendrogram represents clustering of co-expressed genes in which modules are represented in distinct colors.**

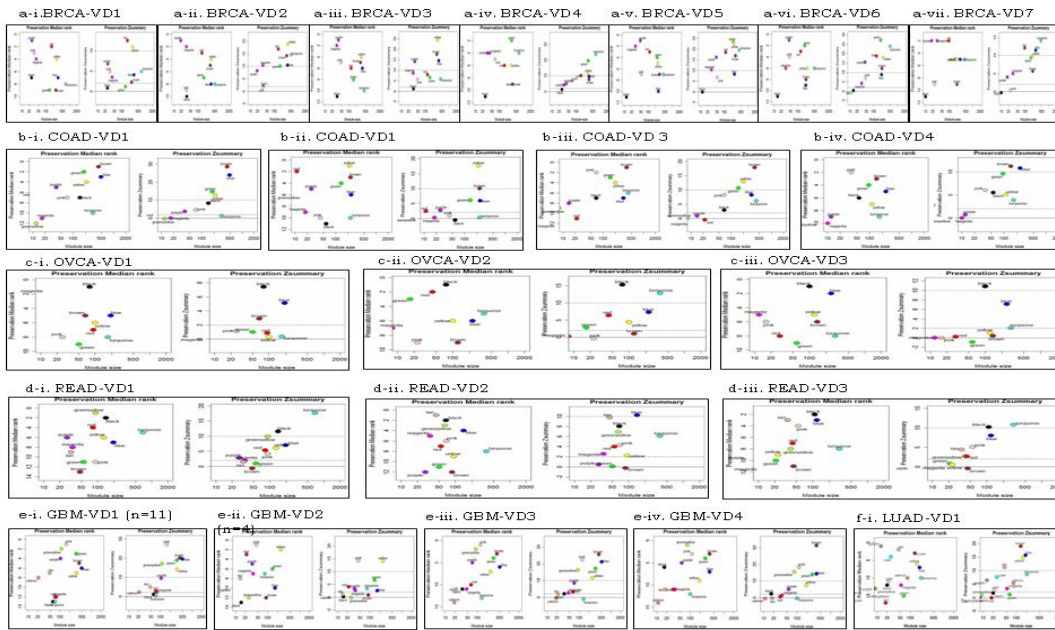

**Supplementary Dataset3-Fig.2. Module preservation analysis (*medianRank* and *Zsummary* statistics) for cancer types across validation datasets, a-i-a-vii. BRCA, b-i-b-iv. COAD, c-i-c-iii. OVCA, d-i-d-iii. READ, e-i-e-iv. GBM, f-i. LUAD**

Further module preservation statistics were computed as described in Expanded View Dataset2, and identified stability of co-expression relationships between genes of similar modules between the TCGA and validation data (UNC\_AgilentG4502A\_07 vs. Affymetrix; Supplementary Dataset3-Fig.2). This cross-platform validation identifies an overlap in expression and clustering of genes between the TCGA and validation dataset network modules (Supplementary Dataset3-Table2). However, of the three strongly conserved Gene Sets identified earlier (Supplementary Dataset2-Tables 2,3) only the Set1 (n=161) and Set2 (n=50) genes were at least moderately conserved in all validation datasets of the BRCA-COAD-OVCA-READ group, while the Set1-s genes were strongly conserved in the GBM-LUAD group (Supplementary Dataset3-Fig.3). Thereby, Set3 genes were discontinued from further analysis.

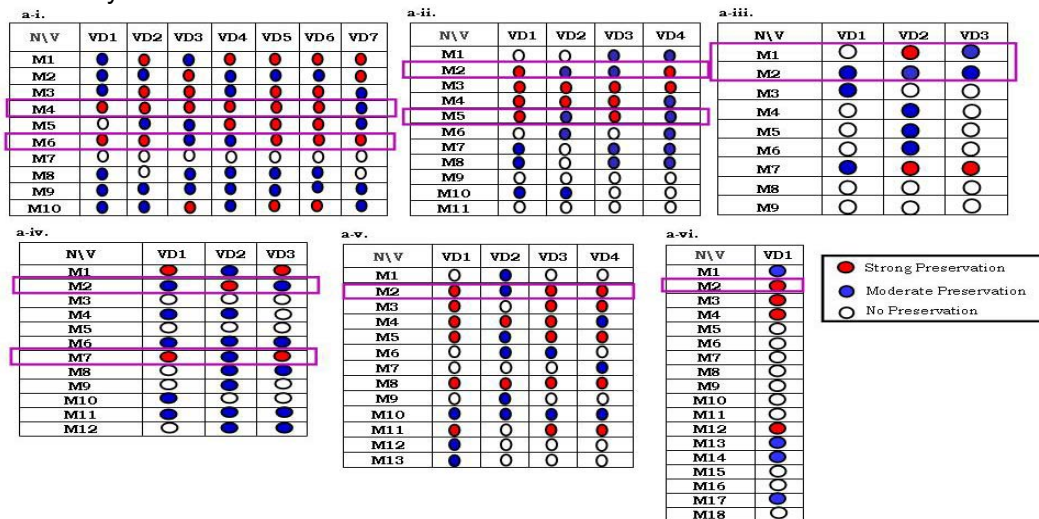

**Supplementary Dataset3-Fig.3. Validation of WGCNA-based network modules in datasets downloaded from GEO (Expanded View Dataset3-Table1) for - a-i. BRCA, a-ii. COAD, a-iii.**

**OVCA, a-iv. READ, a-v. GBM and, a-vi. LUAD. Modules highlighted in the box represent Set 1 and Set 2 genes in case of the strongly preserved group (BRCA-COAD-OVCA-READ) and Set 1 genes for the moderately preserved group (GBM-LUAD).**

## **References –**

### **BRCA-VD1-VD7**

1. Planche A, Bacac M, Provero P, Fusco C, Delorenzi M, Stehle JC, et al. Identification of prognostic molecular features in the reactive stroma of human breast and prostate cancer. *PLoS.One* 2011;6:e18640.
2. Iwamoto T, Bianchini G, Booser D, Qi Y, Coutant C, Shiang CY, Santarpia L, et al. Gene pathways associated with prognosis and chemotherapy sensitivity in molecular subtypes of breast cancer. *J.Natl.Cancer Inst* 2011;103:264-272.
3. Kretschmer C, Sterner-Kock A, Siedentopf F, Schoenegg W, Schlag PM, Kemmner W. Identification of early molecular markers for breast cancer. *Mol.Cancer* 2011;10:15.
4. Boersma BJ, Reimers M, Yi M, Ludwig JA, Luke BT, Stephens RM, et al. A stromal gene signature associated with inflammatory breast cancer. *Int.J.Cancer* 2008;122:1324-1332.
5. Turashvili G, Bouchal J, Baumforth K, Wei W, Dziechciarkova M, Ehrmann J, et al. Novel markers for differentiation of lobular and ductal invasive breast carcinomas by laser microdissection and microarray analysis. *BMC.Cancer* 2007;7: 55.

### **COAD-VD1-VD4**

1. Schlicker A, Beran G, Chresta CM, McWalter G, Pritchard A, Weston S, et al. Subtypes of primary colorectal tumors correlate with response to targeted treatment in colorectal cell lines. *BMC.Med.Genomics* 2012;5:66.
2. Pfister TD, Reinhold WC, Agama K, Gupta S, Khin SA, Kinders RJ, et al. Topoisomerase I levels in the NCI-60 cancer cell line panel determined by validated ELISA and microarray analysis and correlation with indenoisoquinoline sensitivity. *Mol.Cancer Ther* 2009;8:1878-1884.
3. Snipstad K, Fenton CG, Kjaeve J, Cui G, Anderssen E, Paulssen RH. New specific molecular targets for radio-chemotherapy of rectal cancer. *Mol.Oncol* 2010;4:52-64.
4. Auman JT, Church R, Lee SY, Watson MA, Fleshman JW, Mcleod HL. Celecoxib pre-treatment in human colorectal adenocarcinoma patients is associated with gene expression alterations suggestive of diminished cellular proliferation. *Eur.J.Cancer* 2008;44:1754-1760.

### **OVCA-VD1-VD3**

1. Bowen NJ, Walker LD, Matyunina LV, Logani S, Totten KA, Benigno BB, et al. Gene expression profiling supports the hypothesis that human ovarian surface epithelia are multipotent and capable of serving as ovarian cancer initiating cells. *BMC.Med.Genomics* 2009;2:71.
2. Peters D, Freund J, Ochs RL. Genome-wide transcriptional analysis of carboplatin response in chemosensitive and chemoresistant ovarian cancer cells. *Mol.Cancer Ther* 2005;4:1605-1616.
3. Moreno CS, Matyunina L, Dickerson EB, Schubert N, Bowen NJ, Logani S, Benigno BB, et al. Evidence that p53-mediated cell-cycle-arrest inhibits chemotherapeutic treatment of ovarian carcinomas. *PLoS.One* 2007;2:e441..

### **READ-VD1-VD3**

1. Snipstad K, Fenton CG, Kjaeve J, Cui G, Anderssen E, Paulssen RH. New specific molecular targets for radio-chemotherapy of rectal cancer. *Mol.Oncol* 2010;4:52-64.

2. Tsuji S, Midorikawa Y, Takahashi T, Yagi K, Takayama T, Yoshida K, et al. Potential responders to FOLFOX therapy for colorectal cancer by Random Forests analysis. *Br.J.Cancer* 2012;106:126-132.

#### **GBM-VD1-VD4**

1. Grzmil M, Morin P Jr, Lino MM, Merlo A, Frank S, Wang Y, et al. MAP kinase-interacting kinase 1 regulates SMAD2-dependent TGF-beta signaling pathway in human glioblastoma. *Cancer Res* 2011;71:2392-2402.
2. Schulte A, Günther HS, Phillips HS, Kemming D, Martens T, Kharbanda S, et al. A distinct subset of glioma cell lines with stem cell-like properties reflects the transcriptional phenotype of glioblastomas and overexpresses CXCR4 as therapeutic target. *Glia* 2011;59:590-602.
3. Freije WA, Castro-Vargas FE, Fang Z, Horvath S, Cloughesy T, Liao LM, et al. Gene expression profiling of gliomas strongly predicts survival. *Cancer Res* 2004;64:6503-6510.
4. Sun L, Lee J, Fine HA. Neuronally expressed stem cell factor induces neural stem cell migration to areas of brain injury. *J.Clin.Invest*, 2004;113:1364-1374.

#### **LUAD-VD1**

1. Landi MT, Dracheva T, Rotunno M, Figueroa JD, Liu H, Dasgupta A, et al. Gene expression signature of cigarette smoking and its role in lung adenocarcinoma development and survival. *PLoS.One* 2008;3:e1651.

## Supplementary Dataset4: Identification of Master Regulator Networks

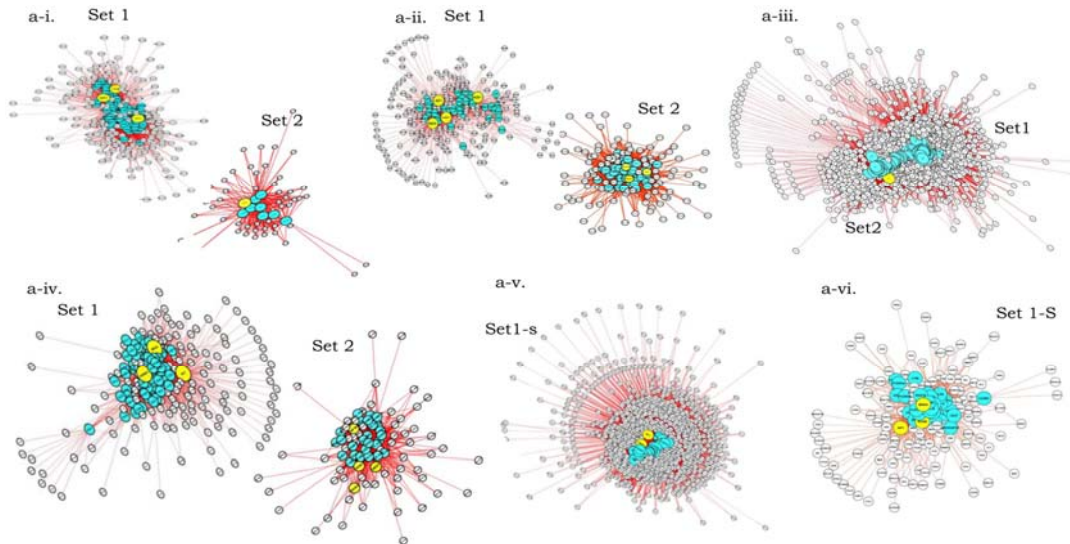

**Supplementary Dataset4-Fig.1.** Gene interaction networks for, a-i to a-iv. Set1 and Set2 genes in BRCA, COAD, OVCA, READ respectively; a-v, a-vi. Set1-s genes in GBM, LUAD respectively; Cyan colored nodes denote significant hubs ( $\geq 10$  interactions) while yellow colored nodes represent transcription factors.

**Supplementary Dataset4-Table1: List of enriched hub markers in Supplementary Dataset4-Fig.1.**

### (i) BRCA-COAD-OVCA

| BRCA     |          |        | COAD     |         | OVCA     |         |          |         |
|----------|----------|--------|----------|---------|----------|---------|----------|---------|
| Set1     |          | Set2   | Set1     | Set2    | Set1     |         |          | Set2    |
| AIF1     | CLEC4A   | COL1A1 | AIF1     | PRRX1   | AIF1     | CD247   | DPEP2    | COL5A2  |
| IKZF1    | PTPRC    | COL1A2 | ITK      | BGN     | IKZF1    | SIGLEC7 | CD38     | THBS2   |
| ITK      | APOBEC3H | COL5A1 | ARHGAP30 | COL10A1 | TBX21    | FCGR1A  | JAK2     | SPARC   |
| ARHGAP30 | CD5      | COL5A2 | ARHGAP9  | COL11A1 | MNDA     | NPL     | CD3D     | COL5A1  |
| ARHGAP9  | CORO1A   | COL6A3 | BTK      | COL12A1 | SAMSN1   | ICOS    | VAV1     | VCAN    |
| BTK      | CRTAM    | ADAM12 | HCLS1    | COL1A1  | LCP2     | RNASE6  | CORO1A   | WISP1   |
| HCLS1    | CST7     | CDH11  | LCP2     | COL1A2  | CD53     | SELPLG  | LAG3     | FAP     |
| LCP2     | EOMES    | FAP    | ARHGAP15 | COL3A1  | LAPTM5   | NCF4    | LRRRC8C  | COL6A3  |
| PSCD4    | GFI1     |        | FYB      | COL5A1  | HAVCR2   | TRPV2   | KLHL6    | INHBA   |
| ARHGAP15 | HAVCR2   |        | CCR2     | COL5A2  | PLEK     | SLAMF7  | SUCNR1   | COL1A2  |
| FYB      | IL2RB    |        | CD2      | COL6A3  | PTPRC    | CCR2    | CD5      | ITGA11  |
| AMICA1   | LCK      |        | CD247    | COL8A1  | CYBB     | EDG6    | PVRIG    | ADAM12  |
| CCR2     | LPXN     |        | EVI2A    | NID2    | TAGAP    | RAC2    | APOBEC3H | CTSK    |
| CCR7     | LTB      |        | EVI2B    | POSTN   | LAIR1    | DOCK8   | P2RY6    | CDH11   |
| CD2      | NCKAP1L  |        | HAVCR2   | SPARC   | TNFSF13B | PTAFR   | APOBEC3G | COL3A1  |
| CD247    | PDCD1    |        | HCST     | ADAM12  | CD48     | IL7R    | CD28     | COL1A1  |
| CD27     | PIK3CG   |        | ITGB2    | CDH11   | ARHGAP9  | CD74    | VMO1     | PRRX1   |
| CD28     | PRKCB1   |        | LAPTM5   | CTHRC1  | SLA      | CCR1    | CD3G     | POSTN   |
| EBI2     | PSCDBP   |        | P2RY10   | CTSK    | ITGB2    | FCGR3A  | IRAK3    | COL11A1 |
| EDG6     | PSTPIP1  |        | DOK3     | FAP     | FYB      | ITGA4   | PARVG    | LOXL2   |
| EVI2A    | PTPN22   |        | PLEK     | INHBA   | LILRB3   | RGS1    | LCP1     | COL8A1  |
| EVI2B    | PVRIG    |        | CYBB     | ITGA11  | CD2      | CCR7    | MMP9     | P4HA3   |
| HCST     | RAC2     |        | CCL5     | ITGBL1  | CCL5     | IFI30   | RASSF4   | ITGBL1  |
| ICOS     | SH2D1A   |        | CD33     | LOXL2   | PSCD4    | CD52    | LTB      | LRRRC15 |
| IL21R    | SIT1     |        | CD37     | MXRA5   | URP2     | P2RY10  | HPSE     | EDNRA   |
| IL7R     | SLAMF7   |        | CD3D     | NOX4    | RGS18    | VNN2    | IGHM     | SPON2   |
| ITGB2    | TBC1D10C |        | CD3G     | P4HA3   | TRAF3IP3 | ITK     | CCL19    | PPEF1   |

|        |  |  |        |          |          |         |          |          |
|--------|--|--|--------|----------|----------|---------|----------|----------|
| KLHL6  |  |  | CD48   | CHSY-2   | CD37     | CST7    | PSTPIP1  | CTHRC1   |
| LAPTM5 |  |  | CD52   | DIO2     | NCF2     | HCLS1   | PDCD1    | BGN      |
| LILRB1 |  |  | CD53   | F2R      | BTK      | CD69    | IGKC     | MMP11    |
| P2RY10 |  |  | CD74   | LRRC15   | NCKAP1L  | IL21R   | ICAM1    | RCN3     |
| PARVG  |  |  | CD96   | MMP11    | IL2RB    | SH2D1A  | CTSL1    | TMEM46   |
| DOK3   |  |  | CLEC4A | PPAPDC1A | CD33     | CD86    | ACP5     | COL10A1  |
| PLEK   |  |  | PTPRC  | PPEF1    | LILRB1   | CD72    | CCL17    | NID2     |
| CYBB   |  |  | KLHL6  | PRR16    | PSCDBP   | SIGLEC5 | CHST11   | TNFSF4   |
| CCL17  |  |  | IKZF1  | RCN3     | ARHGAP15 | LPXN    | GF11     | CORIN    |
| CCL5   |  |  | MNDA   | SGIP1    | EBI2     | TRAT1   | IL411    | F2R      |
| CD33   |  |  | SAMSN1 | SPARC    | WDFY4    | SLC37A2 | JAKMIP1  | DIO2     |
| CD37   |  |  | SLA    | SPOCD1   | ARHGDIB  | CRTAM   | PRKCB1   | SGIP1    |
| CD38   |  |  | CCR1   | SPON2    | EVI2B    | SIT1    | LCK      | COL12A1  |
| CD3D   |  |  | CD28   | THBS2    | ARHGAP30 | PIK3CG  | CLEC12A  | MXRA5    |
| CD3G   |  |  | FCGR2B | THY1     | FCGR2B   | ADAM8   | CD40     | SPOCD1   |
| CD48   |  |  | LAIR1  | TNFSF4   | DOK3     | PKD2L1  | CLC      | PRR16    |
| CD52   |  |  | LCP1   | VCAN     | EVI2A    | CD27    | TMEM149  | THY1     |
| CD53   |  |  | CD86   | WISP1    | AMICA1   | CD96    | RAB42    | NOX4     |
| CD69   |  |  | CTSL1  | ZNF469   | CLEC4A   | KLHDC7B | PLA2G7   | PPAPDC1A |
| CD72   |  |  | IL2RB  |          | PTPN22   | HCST    | TBC1D10C |          |
| CD74   |  |  |        |          | LY86     | KLRC1   | SLFN11   |          |
| CD96   |  |  |        |          | TLR1     | EOMES   |          |          |

**(i) READ-GBM-LUAD**

| READ     |         |         | GBM      |         |          | LUAD    |  |
|----------|---------|---------|----------|---------|----------|---------|--|
| Set1     |         | Set2    | Set1-s   |         |          | Set1-s  |  |
| AIF1     | ITGA4   | PRRX1   | AIF1     | LCP1    | AIF1     | LY86    |  |
| MNDA     | ITGB2   | BGN     | APOBEC3G | LCP2    | ARHGAP30 | MNDA    |  |
| SAMSN1   | KLHL6   | COL10A1 | ARHGAP30 | LILRB1  | ARHGAP9  | NCF2    |  |
| ITK      | LAIR1   | COL11A1 | ARHGAP9  | LPXN    | BTK      | NCKAP1L |  |
| ARHGAP30 | LAPTM5  | COL12A1 | BTK      | LY86    | CD33     | PLEK    |  |
| ARHGAP9  | LILRB1  | COL1A1  | CD33     | MNDA    | CD37     | PTPRC   |  |
| BTK      | LILRB3  | COL1A2  | CD37     | NCF2    | CD53     | RGS18   |  |
| HCLS1    | LY86    | COL3A1  | CD53     | NCKAP1L | CD86     |         |  |
| LCP2     | P2RY10  | COL5A1  | CD69     | NPL     | CLEC4A   |         |  |
| NCF2     | PARVG   | COL5A2  | CD86     | P2RY6   | CYBB     |         |  |
| PSCD4    | RGS18   | COL6A3  | CLEC4A   | PLEK    | EBI2     |         |  |
| ARHGAP15 | SIGLEC7 | COL8A1  | CYBB     | PSCDBP  | EVI2B    |         |  |
| FYB      | DOK3    | NID2    | EBI2     | PTAFR   | FCGR1A   |         |  |
| APOBEC3G | LCP1    | POSTN   | EVI2B    | PTPRC   | FCGR2B   |         |  |
| SLA      | ACP5    | SPARC   | FCGR1A   | RAB42   | FCGR3A   |         |  |
| AMICA1   | PLEK    | ADAM12  | FCGR2B   | RGS18   | FYB      |         |  |
| CCR1     | CYBB    | CDH11   | FCGR3A   | RNASE6  | HAVCR2   |         |  |
| CCR2     | CCL17   | CTHRC1  | FYB      | SAMSN1  | HCLS1    |         |  |
| CCR7     | CCL5    | CTSK    | HAVCR2   | SIGLEC5 | IFI30    |         |  |
| CD2      | PLA2G7  | FAP     | HCLS1    | SIGLEC7 | IL411    |         |  |
| CD247    | NCKAP1L | INHBA   | IFI30    | SLA     | LAIR1    |         |  |
| CD27     | CD33    | ITGA11  | IL411    | SLC37A2 | LAPTM5   |         |  |
| CD28     | CD37    | ITGBL1  | ITGB2    | SUCNR1  | LCP1     |         |  |
| DPEP2    | CD38    | LOXL2   | KLHDC7B  | TLR1    | LCP2     |         |  |
| EBI2     | CD3D    | MXRA5   | LAIR1    | VMO1    | LILRB1   |         |  |
| EDG6     | CD3G    | NOX4    | LAPTM5   | VNN2    | LPXN     |         |  |
| EVI2A    | CD48    | P4HA3   |          |         |          |         |  |
| EVI2B    | CD52    |         |          |         |          |         |  |
| FCGR1A   | CD53    |         |          |         |          |         |  |
| FCGR2B   | CD69    |         |          |         |          |         |  |
| HAVCR2   | CD72    |         |          |         |          |         |  |
| HCST     | CD74    |         |          |         |          |         |  |
| ICOS     | CD86    |         |          |         |          |         |  |



|       |        |  |  |  |  |  |
|-------|--------|--|--|--|--|--|
| IFI30 | CD96   |  |  |  |  |  |
| IL21R | CLEC4A |  |  |  |  |  |
| IL7R  | PTPRC  |  |  |  |  |  |

**Supplementary Dataset4-Table2: Transcription factors within interaction network of Set1 (BRCA-COAD-OVCA-READ) and Set1-s (GBM-LUAD), red color denotes significant hub markers while blue color denotes interacting partners**

| Set1   |        |         |        |         |         | Set2  |        |        |        |
|--------|--------|---------|--------|---------|---------|-------|--------|--------|--------|
| BRCA   | COAD   | OVCA    | READ   | GBM     | LUAD    | BRCA  | COAD   | OVCA   | READ   |
| AIF1   | AIF1   | AIF1    | AIF1   | AIF1    | AIF1    | PRRX1 | PRRX1  | PRRX1  | PRRX1  |
| IKZF1  | IKZF1  | IKZF1   | IKZF1  | IKZF1   | -       | -     | TWIST1 | TWIST1 | TWIST1 |
| MNDA   | MNDA   | MNDA    | MNDA   | MNDA    | MNDA    | -     | -      | SNAI2  | SNAI2  |
| SAMSN1 | SAMSN1 | SAMSN1  | SAMSN1 | SAMSN1  | SAMSN1  | -     | -      | ZEB1   | -      |
| EOMES  | -      | EOMES   | -      | -       | -       | -     | -      | ZEB2   | -      |
| GFI1   | -      | GFI1    | -      | GFI1    | -       | -     | -      | SNAI1  | -      |
| -      | -      | KLHDC7B | -      | KLHDC7B | KLHDC7B | -     | -      | -      | -      |
| EVI2A  | EVI2A  | EVI2A   | EVI2A  | EVI2A   | EVI2A   | -     | -      | -      | -      |
| EVI2B  | EVI2B  | EVI2B   | EVI2B  | EVI2B   | EVI2B   | -     | -      | -      | -      |
| TBX21  | TBX21  | TBX21   | TBX21  | TBX21   | -       | -     | -      | -      | -      |

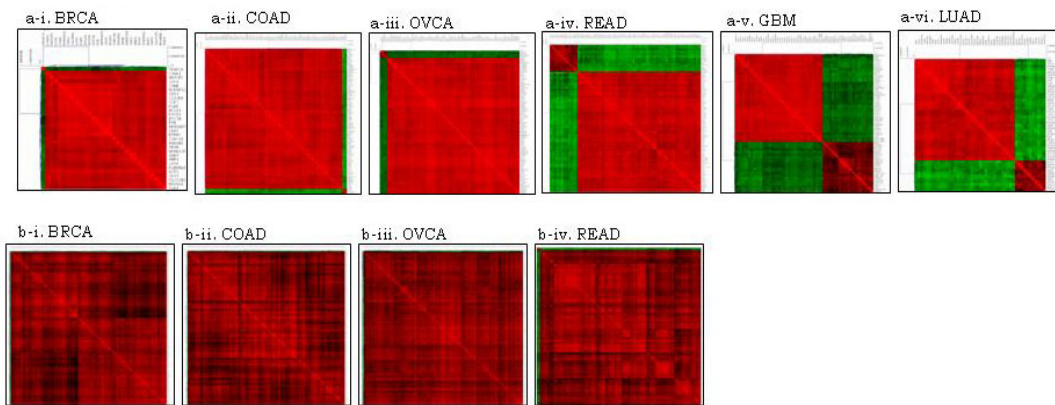

**Supplementary Dataset4-Fig.2. Correlation analysis for AIF1 and PRRX1 expression within six cancer types. a-i-a-vi . Correlation plot for genes correlated with AIF1 for BRCA, COAD, OVCA, READ, GBM and LUAD cancer types respectively. b-i-b-iv. Correlation plot for genes correlated with PRRX1 for BRCA, COAD, OVCA, READ, GBM and LUAD cancer types respectively. Correlation value denoted with red color shows positive correlation while green colored denotes negative correlation among genes.**

**Supplementary Dataset4-Table3: Identification of classifiers for 3 sets**

| SET1 classifiers(36) | SET2 classifiers(8) | Set1-s classifiers (33) |
|----------------------|---------------------|-------------------------|
| AIF1                 | COL1A1              | AIF1                    |
| ITK                  | COL1A2              | ARHGAP30                |
| ARHGAP30             | COL5A1              | ARHGAP9                 |
| ARHGAP9              | COL5A2              | BTK                     |
| BTK                  | COL6A3              | CD33                    |
| HCLS1                | ADAM12              | CD37                    |
| LCP2                 | CDH11               | CD53                    |
| ARHGAP15             | FAP                 | CD86                    |
| FYB                  |                     | CLEC4A                  |
| CCR2                 |                     | CYBB                    |
| CD2                  |                     | EBI2                    |
| CD247                |                     | EVI2B                   |

|        |  |         |
|--------|--|---------|
| CD28   |  | FCGR1A  |
| EVI2A  |  | FCGR2B  |
| EVI2B  |  | FCGR3A  |
| HCST   |  | FYB     |
| ITGB2  |  | HAVCR2  |
| KLHL6  |  | HCLS1   |
| LAPTM5 |  | IFI30   |
| P2RY10 |  | IL411   |
| DOK3   |  | LAIR1   |
| PLEK   |  | LAPTM5  |
| CYBB   |  | LCP1    |
| CCL5   |  | LCP2    |
| CD33   |  | LILRB1  |
| CD37   |  | LPXN    |
| CD3D   |  | LY86    |
| CD3G   |  | MNDA    |
| CD48   |  | NCF2    |
| CD52   |  | NCKAP1L |
| CD53   |  | PLEK    |
| CD74   |  | PTPRC   |
| CD96   |  | RGS18   |
| CLEC4A |  |         |
| PTPRC  |  |         |
| HAVCR2 |  |         |

**Supplementary Dataset5: Validation of AIF1 and PRRX1 as master regulators independent of TCGA in validation datasets of 6 cancers**

AIF1 and PRRX1 were predicted as master gene regulators of immunomodulation and metastases functionalities. To confirm that these results were not specific to the TCGA gene expression datasets, we identified the weighted gene interactions regulated by Set1/Set1-s and Set2 genes independently in other datasets of six cancers (Supplementary Dataset3-Table1). Towards this purpose, validation datasets which showed strongest preservation (in context of *Zsummary* and *medianRank* statistics) of Set1/Set1-s and Set2 for six cancers were selected for network analysis and visualization (Supplementary Dataset3.Fig.3). Comparing gene interaction network outputs between the TCGA and these select validation dataset analyses identified similar partners across these datasets and thereby affirmed regulation of genes and TFs involved in immune responses and metastasis to be governed by AIF1 and PRRX1 respectively (Supplementary Dataset5-Fig.1; Supplementary Dataset5-Tables 1,2).

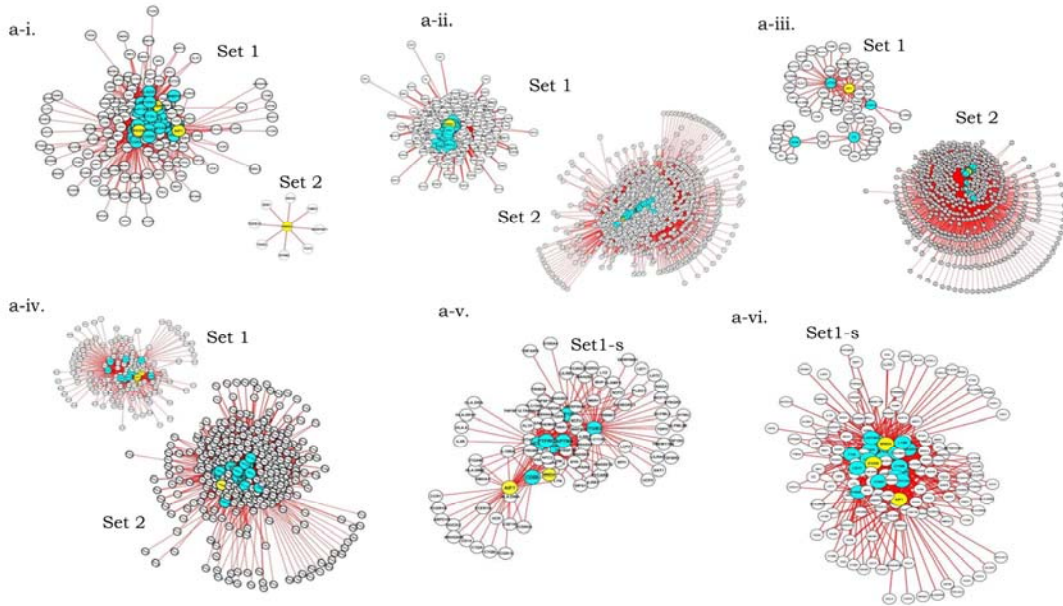

**Supplementary Dataset5-Fig.1.a-i to a-iv. Gene interaction networks for Set1 and Set2 genes in BRCA, COAD, OVCA, READ validation datasets respectively; a-v, a-vi. Set1-s genes in GBM, LUAD validation datasets respectively; Cyan colored nodes denote significant hubs (>= 10 interactions) while yellow colored nodes represent transcription factors.**

**Supplementary Dataset5-Table1. Common interactors of AIF1 between TCGA and validation datasets**

| BRCA - VD3 | BRCA - VD5 | BRCA - VD6 | COAD - VD1 | COAD - VD4 | OVCA - VD1 | READ - VD2 | GBM -VD1 |          |          | GBM - VD3 | GBM - VD1 |
|------------|------------|------------|------------|------------|------------|------------|----------|----------|----------|-----------|-----------|
| 2          | 20         | 21         | 44         | 7          | 16         | 11         | 106      |          |          | 27        | 37        |
| CD53       | C3AR1      | C3AR1      | ALOX5AP    | CD14       | C1QB       | ALOX5AP    | ALOX5    | GIMAP6   | RASSF5   | ARHGDIB   | ALOX5AP   |
| NCF4       | CD53       | CD53       | AMICA1     | CLEC2B     | CD14       | CCL2       | AOAH     | GIMAP8   | RGS18    | C1QA      | BCL2A1    |
|            | DOCK2      | CLEC4A     | ARHGAP9    | DPYD       | CD163      | CD48       | APBB1IP  | GPR34    | RNASE6   | C1QB      | C3AR1     |
|            | EVI2A      | CYBB       | CCR1       | FCER1G     | CD48       | CD52       | APOC2    | HAVCR2   | SAMSN1   | CCR1      | CCL2      |
|            | EVI2B      | DOCK2      | CCR2       | LAPTM5     | CD53       | CD72       | ARHGAP15 | HCK      | SCIN     | CD14      | CD52      |
|            | FYB        | EVI2B      | CD14       | PLA2G7     | CD68       | CD74       | ARHGAP30 | HCLS1    | SIGLEC10 | CSF1R     | CD53      |
|            | HCLS1      | FYB        | CD300A     | VAMP5      | EVI2B      | CD86       | ARHGAP9  | HLA.DMA  | SLA      | DOCK2     | CD86      |
|            | IL10RA     | HCLS1      | CD300LF    |            | HCLS1      | HAVCR2     | BLNK     | HLA.DMB  | SLC7A7   | FCER1G    | CLEC4A    |
|            | LAIR1      | IL10RA     | CD48       |            | HLA.DMB    | HLA.DRA    | BST2     | HLA.DOA  | SLCO2B1  | FCGR2A    | CYBB      |
|            | LAPTM5     | LAPTM5     | CD52       |            | HLA.DRA    | LST1       | C1QA     | HLA.DPA1 | TFEC     | HCK       | EVI2A     |
|            | LCP2       | LCP2       | CD53       |            | ITGB2      | RGS1       | C1QB     | HLA.DPB1 | TLR1     | HCLS1     | EVI2B     |
|            | LY86       | LY86       | CD69       |            | MYO5A      |            | C1QC     | HLA.DRA  | TLR2     | HLA.DMA   | FCER1G    |

|  |         |         |          |  |         |  |         |          |          |         |          |
|--|---------|---------|----------|--|---------|--|---------|----------|----------|---------|----------|
|  | MNDA    | MNDA    | CD86     |  | NCF4    |  | C3      | HLA.DRB5 | TLR7     | HLA.DMB | FCGR2A   |
|  | NCF4    | NCF4    | CLEC2B   |  | NCKAP1L |  | C3AR1   | HLA.E    | TNFRSF1B | HMHA1   | FCGR2B   |
|  | PLEK    | PLEK    | CLEC4A   |  | SLA     |  | CASP1   | HMHA1    | TNFSF13B | ITGAM   | FYB      |
|  | PTPRC   | PTPRC   | DOK3     |  | SRGN    |  | CCR1    | IGSF6    | TREM2    | ITGB2   | GMFG     |
|  | RNASE6  | RNASE6  | EVI2A    |  |         |  | CD14    | IKZF1    | TYROBP   | LAIR1   | HCK      |
|  | SAMSN1  | SAMSN1  | EVI2B    |  |         |  | CD163   | IL6R     | VSIG4    | LAPTM5  | HLA.DPA1 |
|  | SELPLG  | SELPLG  | FLI1     |  |         |  | CD53    | IRF8     |          | LY96    | HLA.DRA  |
|  | SLCO2B1 | SLCO2B1 | GAB3     |  |         |  | CD74    | ITGB2    |          | MNDA    | IFI30    |
|  |         | TRPV2   | HAVCR2   |  |         |  | CD84    | LAIR1    |          | PTPRC   | ITGAM    |
|  |         |         | HCLS1    |  |         |  | CD86    | LAPTM5   |          | SAMSN1  | ITGB2    |
|  |         |         | HCST     |  |         |  | CLEC7A  | LAT2     |          | SLA     | LAPTM5   |
|  |         |         | HLA.DMB  |  |         |  | CSF1R   | LCP2     |          | STAB1   | LCP1     |
|  |         |         | ITGA4    |  |         |  | CSTA    | LILRA2   |          | TLR2    | LCP2     |
|  |         |         | ITGB2    |  |         |  | CTSH    | LILRB1   |          | TYROBP  | LY86     |
|  |         |         | LILRB1   |  |         |  | CTSS    | LY86     |          | VSIG4   | MAFB     |
|  |         |         | LST1     |  |         |  | CXCL16  | LYZ      |          |         | MNDA     |
|  |         |         | LY86     |  |         |  | CYBB    | MAFB     |          |         | MS4A4A   |
|  |         |         | LY96     |  |         |  | CYSLTR1 | MGAT4A   |          |         | MS4A6A   |
|  |         |         | MS4A4A   |  |         |  | DOCK2   | MNDA     |          |         | MSR1     |
|  |         |         | MS4A6A   |  |         |  | DOCK8   | MPEG1    |          |         | PLEK     |
|  |         |         | NCF2     |  |         |  | EVI2B   | MS4A4A   |          |         | PTPRC    |
|  |         |         | NCKAP1L  |  |         |  | FCER1G  | MS4A6A   |          |         | RNASE6   |
|  |         |         | PLEK     |  |         |  | FCGBP   | MS4A7    |          |         | SLCO2B1  |
|  |         |         | RHOH     |  |         |  | FCGR2A  | MSR1     |          |         | SNX10    |
|  |         |         | SAMSN1   |  |         |  | FGL2    | MYO1F    |          |         | TFEC     |
|  |         |         | SLA      |  |         |  | FKBP5   | NCF4     |          |         |          |
|  |         |         | SLAMF7   |  |         |  | FPR1    | NPL      |          |         |          |
|  |         |         | SRGN     |  |         |  | FYB     | PARVG    |          |         |          |
|  |         |         | STX11    |  |         |  | GIMAP1  | PIK3AP1  |          |         |          |
|  |         |         | TRAF3IP3 |  |         |  | GIMAP2  | PLEK     |          |         |          |
|  |         |         | TRPV2    |  |         |  | GIMAP4  | PSMB9    |          |         |          |
|  |         |         | WIPF1    |  |         |  | GIMAP5  | PTPRC    |          |         |          |

**Supplementary Dataset4-Table2. Common interactors of PRRX1 from TCGA and GEO datasets**

| COAD     | OVCA     |          | READ     |
|----------|----------|----------|----------|
| TCGA-VD1 | TCGA-VD1 | TCGA-VD2 | TCGA-VD1 |
| 10       | 2        | 13       | 5        |
| COL15A1  | TCEAL7   | RND3     | RAB31    |
| FSTL3    | VIM      | SCG2     | SPARC    |
| ITGA5    |          | SEC24D   | SULF1    |
| LEPRE1   |          | SLC2A3   | THBS2    |
| PDPN     |          | SPARC    | VCAN     |
| SGIP1    |          | SPOCK1   |          |
| SPARC    |          | SRPX     |          |
| SPOCK1   |          | TIMP2    |          |
| SPON2    |          | TIMP3    |          |
| WISP1    |          | TMEM158  |          |
|          |          | TMEM47   |          |
|          |          | TPM1     |          |
|          |          | TPM2     |          |

## Supplementary Dataset6: Identification of pathways associated with cancers

Pathways regulated within classes were identified using expression of Set1 (n=161) and Set2 (n=50) genes for BRCA-COAD-OVCA-READ cancers. Set1-s genes were used to identify pathways regulated within classes of GBM-LUAD cancer types using Gene Set Enrichment Analysis (GSEA) software. Cytoscape 2.8.3 was used to generate pathway network using enrichment map plugin ( $p < 0.05$ ). Pathways regulated by Set1 in 4 cancers were up-regulated for class 1 and class 2 whereas for class 3 and 4 it shows downregulation (Supplementary Dataset6-Fig 1; Supplementary Dataset6-Table 1); Two subtypes of GBM-LUAD show up and down-regulation of pathways which were regulated by Set1-s genes (Supplementary Dataset6-Fig 2; Supplementary Dataset6-Table 2) and involved in immune functionalities. Set2 genes were responsible for up-regulation of pathways within class 1 and 3 patients and down-regulation of class 2 and 4 patients (Supplementary Dataset6-Fig 3; Supplementary Dataset6-Table 3).

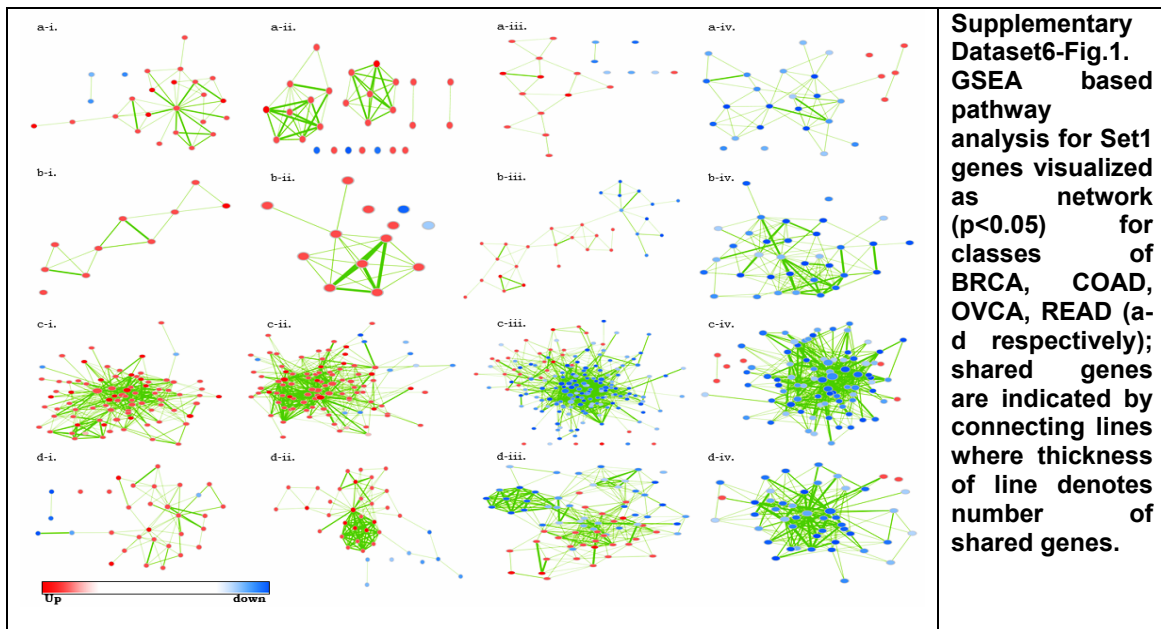

**Supplementary Dataset6-Table1. Set1 associated Pathways within 4 classes of BRCA-COAD-OVCA-READ**

| NO.         | Class 1                          | Class 2                                             | Class 3                       | Class 4                                        |
|-------------|----------------------------------|-----------------------------------------------------|-------------------------------|------------------------------------------------|
| <b>BRCA</b> |                                  |                                                     |                               |                                                |
| 1           | HAN_SATB1_TARGETS_UP             | PID_SHP2_PATHWAY                                    | CROONQUIST_IL6_DEPRIVATION_UP | PANGAS_TUMOR_SUPPRESSION_BY_SMAD1_AND_SMAD5_UP |
| 2           | LEE_DIFFERENTIATING_T_LYMPHOCYTE | REACTOME_PHOSPHORYLATION_OF_CD3_AND_TCR_ZETA_CHAINS | BIOCARTA_TALL1_PATHWAY        |                                                |
| 3           | MORI_SMALL_PRE_BII_LYMPHOCYTE_UP | BIOCARTA_IL2_PATHWAY                                |                               |                                                |
| 4           |                                  | GOLDRATH_IMMUNE_MEMORY                              |                               |                                                |
| 5           |                                  | GAVIN_FOXP3_TARGETS_CLUSTER_P2                      |                               |                                                |
| 6           |                                  | PLASARI_TGFB1_SIGNALING_VIA_NFIC_10HR_UP            |                               |                                                |
| 7           |                                  | MARZEC_IL2_SIGNALING_UP                             |                               |                                                |
| 8           |                                  | PID_IL2_1PATHWAY                                    |                               |                                                |
| 9           |                                  | GAVIN_IL2_RESPONSIVE_FOXP3_TARGETS_UP               |                               |                                                |
| 10          |                                  | PID_IL2_STAT5PATHWAY                                |                               |                                                |

|             |                                                      |                                                                                       |                                             |                                              |
|-------------|------------------------------------------------------|---------------------------------------------------------------------------------------|---------------------------------------------|----------------------------------------------|
| 11          |                                                      | BIOCARTA_TCRA_PATHWAY                                                                 |                                             |                                              |
| 12          |                                                      | BIOCARTA_CTL_PATHWAY                                                                  |                                             |                                              |
| 13          |                                                      | BIOCARTA_IL17_PATHWAY                                                                 |                                             |                                              |
| <b>COAD</b> |                                                      |                                                                                       |                                             |                                              |
| 1           | LIAN_NEUTROPHIL_GRANULE_CONSTITUENTS                 | ST_B_CELL_ANTIGEN_RECEPTOR                                                            | SANA_TNF_SIGNALING_UP                       | WESTON_VEGFA_TARGETS                         |
| 2           | TONKS_TARGETS_OF_RUNX1_RUNX1T1_FUSION_ERYTHROCYTE_UP | REACTOME_ANTIGEN_ACTIVATED_B_CELL_RECEPTOR_LEADING_TO_GENERATION_OF_SECOND_MESSENGERS | LABBE_TARGETS_OF_TGFB1_AND_WNT3A_DN         | WESTON_VEGFA_TARGETS_3HR                     |
| 3           |                                                      | REACTOME_SIGNALING_BY_THE_B_CELL_RECEPTOR_BCR                                         | GROSS_HIF1A_TARGETS_UP                      | ZHENG_FOXP3_TARGETS_IN_T_LYMPHOCYTE_DN       |
| 4           |                                                      | ST_FAS_SIGNALING_PATHWAY                                                              | HAMAI_APOPTOSIS_VIA_TRAIL_DN                | KEGG_FC_GAMMA_R_MEDIATE_D_PHAGOCYTOSIS       |
| 5           |                                                      | ZHOU_INFLAMMATORY_RESPONSE_LIVE_UP                                                    | PID_INTEGRIN1_PATHWAY                       |                                              |
| 6           |                                                      |                                                                                       | SOUCEK_MYC_TARGETS                          |                                              |
| 7           |                                                      |                                                                                       | GAVIN_FOXP3_TARGETS_CLUSTER_P7              |                                              |
| 8           |                                                      |                                                                                       | DEURIG_T_CELL_PROLYMPHOCYTIC_LEUKEMIA_DN    |                                              |
| <b>OVCA</b> |                                                      |                                                                                       |                                             |                                              |
| 1           | BIOCARTA_GSK3_PATHWAY                                | POOLA_INVASIVE_BREAST_CANCER_UP                                                       | WINTER_HYPOXIA_UP                           | SANSOM_APC_TARGETS_UP                        |
| 2           | WINTER_HYPOXIA_DN                                    | REACTOME_IMMUNE_SYSTEM                                                                | MARSON_BOUND_BY_FOXP3_STIMULATED            | NAKAJIMA_MAST_CELL                           |
| 3           | SCHUETZ_BREAST_CANCER_DUCTAL_INVASIVE_UP             | BIOCARTA_IL12_PATHWAY                                                                 | REACTOME_IMMUNE_SYSTEM                      | WATANABE_ULCERATIVE_COLITIS_WITH_CANCER_DN   |
| 4           | KASLER_HDAC7_TARGETS_2_UP                            | JAZAG_TGFB1_SIGNALING_VIA_S_MAD4_UP                                                   | BROWN_MYELOID_CELL_DEVELOPMENT_DN           | THEILGAARD_NEUTROPHIL_AT_SKIN_WOUND_UP       |
| 5           | ACOSTA_PROLIFERATION_INDEPENDENT_MYC_TARGETS_DN      | REACTOME_ADAPTIVE_IMMUNE_SYSTEM                                                       | REACTOME_COSTIMULATION_BY_THE_CD28_FAMILY   | HADDAD_T_LYMPHOCYTE_AND_NK_PROGENITOR_DN     |
| 6           | PEDERSEN_METASTASIS_BY_ERBB2_ISOFORM_6               | BIOCARTA_DC_PATHWAY                                                                   | MARSON_BOUND_BY_FOXP3_UNSTIMULATED          | TONKS_TARGETS_OF_RUNX1_RUNX1T1_FUSION_HSC_DN |
| 7           | GILDEA_METASTASIS                                    | GAVIN_PDE3B_TARGETS                                                                   | REACTOME_ADAPTIVE_IMMUNE_SYSTEM             | WIERENGA_STAT5A_TARGETS_GROUP2               |
| 8           | WORSCHTUMOR_EVASION_AND_TOLEROGENICITY_UP            | BIOCARTA_TCYTOTOXIC_PATHWAY                                                           | SIG_CHEMOTAXIS                              | REACTOME_SEMA4D_IN_SEMAPHORIN_SIGNALING      |
| 9           | THEILGAARD_NEUTROPHIL_AT_SKIN_WOUND_UP               | BIOCARTA_THELPER_PATHWAY                                                              | BIOCARTA_TCYTOTOXIC_PATHWAY                 | HAN_JNK_SIGNALING_UP                         |
| 10          | RAMALHO_STEMNESS_DN                                  | BIOCARTA_IL17_PATHWAY                                                                 | BIOCARTA_THELPER_PATHWAY                    | XU_HGF_TARGETS_REPRESSED_BY_AKT1_DN          |
| 11          | HAHTOLA_CTCL_PATHOGENESIS                            | LEE_DIFFERENTIATING_T_LYMPHOCYTE                                                      | BIOCARTA_TCR_PATHWAY                        | BIOCARTA_TOLL_PATHWAY                        |
| 12          | LINDSTEDT_DENDRITIC_CELL_MATURATION_DN               | NGUYEN_NOTCH1_TARGETS_DN                                                              | BASSO_CD40_SIGNALING_DN                     | SANSOM_APC_TARGETS_DN                        |
| 13          | BROWN_MYELOID_CELL_DEVELOPMENT_UP                    | KONDO_HYPOXIA                                                                         | WANG_RESPONSE_TO_GSK3_INHIBITOR_SB216763_UP | BIOCARTA_GSK3_PATHWAY                        |
| 14          | YE_METASTATIC_LIVER_CANCER                           | FAELT_B_CELL_WITH_VH_REARRANGEMENTS_UP                                                | KEGG_T_CELL_RECEPTOR_SIGNALING_PATHWAY      | PID_INTEGRIN_CS_PATHWAY                      |
| 15          | HOEBEKE_LYMPHOID_STEM_CELL_UP                        | THEILGAARD_NEUTROPHIL_AT_SKIN_WOUND_UP                                                | HADDAD_T_LYMPHOCYTE_AND_NK_PROGENITOR_DN    | GAVIN_PDE3B_TARGETS                          |
| 16          | KEGG_CELL_ADHESION_MOLECULES_CAMS                    | REACTOME_IL_RECEPTOR_SHC_SIGNALING                                                    | CHIARETTI_T_ALL_REFRACTORY_TO_THERAPY       | PID_INTEGRIN1_PATHWAY                        |
| 17          | BIOCARTA_NKT_PATHWAY                                 | WANG_METASTASIS_OF_BREAST_CANCER_ESR1_DN                                              | REACTOME_TCR_SIGNALING                      | SWEET_KRAS_TARGETS_UP                        |
| 18          |                                                      | GAVIN_FOXP3_TARGETS_CLUSTER_T4                                                        | ONO_FOXP3_TARGETS_UP                        | MORI_PRE_BI_LYMPHOCYTE_UP                    |
| 19          |                                                      | PEDERSEN_METASTASIS_BY_ERBB2_ISOFORM_6                                                | KONDO_HYPOXIA                               | PID_FCER1PATHWAY                             |
| 20          |                                                      | WINTER_HYPOXIA_UP                                                                     | BIOCARTA_CTLA4_PATHWAY                      | GAVIN_FOXP3_TARGETS_CLUSTER_P4               |
| 21          |                                                      |                                                                                       | SIG_BCR_SIGNALING_PATHWAY                   | YE_METASTATIC_LIVER_CANCER                   |
| 22          |                                                      |                                                                                       | KEGG_CHEMOKINE_SIGNALING_PATHWAY            | POOLA_INVASIVE_BREAST_CANCER_UP              |
| 23          |                                                      |                                                                                       | LIAO_HAVE_SOX4_BINDING_SITES                | PEDERSEN_METASTASIS_BY_ERBB2_ISOFORM_6       |
| 24          |                                                      |                                                                                       | DEURIG_T_CELL_PROLYMPHOCYTIC_LEUKEMIA_DN    | GILDEA_METASTASIS                            |

|             |                                    |                                                           |                                                           |                                                                  |
|-------------|------------------------------------|-----------------------------------------------------------|-----------------------------------------------------------|------------------------------------------------------------------|
|             |                                    |                                                           | C LEUKEMIA_DN                                             |                                                                  |
| 25          |                                    |                                                           | LEE_DIFFERENTIATING_T_LYMPHO CYTE                         | REACTOME_TRAF6_MEDIATED_IRF7_ACTIVATION_IN_TLR7_8_OR_9_SIGNALING |
| 26          |                                    |                                                           | REACTOME_PHOSPHORYLATION_OF_CD3_AND_TCR_ZETA_CHAINS       | HAHTOLA_CTCL_PATHOGENESIS                                        |
| 27          |                                    |                                                           | BIOCARTA_TCRA_PATHWAY                                     | KASLER_HDAC7_TARGETS_2_UP                                        |
| 28          |                                    |                                                           | BIOCARTA_BCR_PATHWAY                                      | BROWN_MYELOID_CELL_DEVELOPMENT_UP                                |
| 29          |                                    |                                                           | REACTOME_DOWNSTREAM_TCR_SIGNALING                         |                                                                  |
| 30          |                                    |                                                           | PID_CD8TCRPATHWAY                                         |                                                                  |
| 31          |                                    |                                                           | SIG_PIP3_SIGNALING_IN_B_LYMPHOCYTES                       |                                                                  |
| 32          |                                    |                                                           | PID_TCR_PATHWAY                                           |                                                                  |
| 33          |                                    |                                                           | HOLLMANN_APOPTOSIS_VIA_CD40_UP                            |                                                                  |
| 34          |                                    |                                                           | REACTOME_INNATE_IMMUNE_SYSTEM                             |                                                                  |
| 35          |                                    |                                                           | BIOCARTA_DC_PATHWAY                                       |                                                                  |
| 36          |                                    |                                                           | REACTOME_G_ALPHA_I_SIGNALING_EVENTS                       |                                                                  |
| 37          |                                    |                                                           | KEGG_B_CELL_RECEPTOR_SIGNALING_PATHWAY                    |                                                                  |
| 38          |                                    |                                                           | PILON_KLF1_TARGETS_DN                                     |                                                                  |
| 39          |                                    |                                                           | REACTOME_TOLL_RECEPTOR_CASCADES                           |                                                                  |
| 40          |                                    |                                                           | ZHENG_FOXP3_TARGETS_IN_T_LYMPHOCYTE_DN                    |                                                                  |
| 41          |                                    |                                                           | MATSUDA_NATURAL_KILLER_DIFFERENTIATION                    |                                                                  |
| 42          |                                    |                                                           | THEILGAARD_NEUTROPHIL_AT_SKIN_WOUND_UP                    |                                                                  |
| 43          |                                    |                                                           | LI_INDUCED_T_TO_NATURAL_KILLER_DN                         |                                                                  |
| 44          |                                    |                                                           | BIOCARTA_NKT_PATHWAY                                      |                                                                  |
| 45          |                                    |                                                           | MARSON_FOXP3_TARGETS_STIMULATED_UP                        |                                                                  |
| 46          |                                    |                                                           | PID_BCR_5PATHWAY                                          |                                                                  |
| 47          |                                    |                                                           | PID_FCER1PATHWAY                                          |                                                                  |
| 48          |                                    |                                                           | BOSCO_TH1_CYTOTOXIC_MODULE                                |                                                                  |
| 49          |                                    |                                                           | SHIN_B_CELL_LYMPHOMA_CLUSTER_3                            |                                                                  |
| <b>READ</b> |                                    |                                                           |                                                           |                                                                  |
| 1           | BIOCARTA_BLYMPHOCYTE_PATHWAY       | LEE_DIFFERENTIATING_T_LYMPHOCYTE                          | SWEET_KRAS_TARGETS_UP                                     | BIOCARTA_BLYMPHOCYTE_PATHWAY                                     |
| 2           | PID_INTEGRIN2_PATHWAY              | BIOCARTA_TCRA_PATHWAY                                     | PID_INTEGRIN1_PATHWAY                                     | COATES_MACROPHAGE_M1_VS_M2_UP                                    |
| 3           | MARSON_FOXP3_TARGETS_STIMULATED_UP | REACTOME_PHOSPHORYLATION_OF_CD3_AND_TCR_ZETA_CHAINS       | MANTOVANI_NFKB_TARGETS_UP                                 | ZHAN_MULTIPLE_MYELOMA_CD1_AND_CD2_UP                             |
| 4           | PID_NFAT_TFPATHWAY                 | REACTOME_TCR_SIGNALING                                    | MANTOVANI_VIRAL_GPCR_SIGNALING_UP                         | ZAMORA_NOS2_TARGETS_DN                                           |
| 5           |                                    | REACTOME_DOWNSTREAM_TCR_SIGNALING                         | PID_INTEGRIN2_PATHWAY                                     | PANGAS_TUMOR_SUPPRESSION_BY_SMAD1_AND_SMAD5_UP                   |
| 6           |                                    | PURBEY_TARGETS_OF_CTBP1_NOT_SATB1_DN                      | MARTINELLI_IMMATURE_NEUTROPHIL_DN                         | HUANG_GATA2_TARGETS_UP                                           |
| 7           |                                    | BIOCARTA_IL12_PATHWAY                                     | WESTON_VEGFA_TARGETS_6HR                                  | PID_INTEGRIN_CS_PATHWAY                                          |
| 8           |                                    | REACTOME_TRANSLOCATION_OF_ZAP_70_TO_IMMUNOLOGICAL_SYNAPSE | PID_INTEGRIN5_PATHWAY                                     | PLASARI_TGFB1_SIGNALING_VIA_NFIC_1HR_UP                          |
| 9           |                                    | REACTOME_PD1_SIGNALING                                    | ZHOU_TNF_SIGNALING_4HR                                    |                                                                  |
| 10          |                                    | ALCALA_APOPTOSIS                                          | KOINUMA_TARGETS_OF_SMAD2_OR_SMAD3                         |                                                                  |
| 11          |                                    | KEGG_NEUROACTIVE_LIGAND_RECEPTOR_INTERACTION              | PLASARI_TGFB1_SIGNALING_VIA_NFIC_10HR_UP                  |                                                                  |
| 12          |                                    | CROONQUIST_IL6_DEPRIVATION_DN                             | BIOCARTA_IL12_PATHWAY                                     |                                                                  |
| 13          |                                    | HAMAI_APOPTOSIS_VIA_TRAIL_UP                              | REACTOME_TRANSLOCATION_OF_ZAP_70_TO_IMMUNOLOGICAL_SYNAPSE |                                                                  |

|    |  |                                                    |                                                                                   |
|----|--|----------------------------------------------------|-----------------------------------------------------------------------------------|
| 14 |  | PID_CXCR4_PATHWAY                                  | REACTOME_PD1_SIGNALING                                                            |
| 15 |  | PID_INTEGRIN_A4B1_PATHWAY                          | WUNDER_INFLAMMATORY_RESPONSE_AND_CHOLESTEROL_UP                                   |
| 16 |  | HOFFMANN_SMALL_PRE_BII_TO_IMMATURE_B_LYMPHOCYTE_DN | REACTOME_NFKB_AND_MAP_KINASES_ACTIVATION_MEDIATED_BY_TLR4_SIGNALING_REPERTOIRE    |
| 17 |  |                                                    | BIOCARTA_CTL_PATHWAY                                                              |
| 18 |  |                                                    | BIOCARTA_TALL1_PATHWAY                                                            |
| 19 |  |                                                    | REACTOME_G_ALPHA_I_SIGNALLING_EVENTS                                              |
| 20 |  |                                                    | PURBEY_TARGETS_OF_CTBP1_NOT_SATB1_DN                                              |
| 21 |  |                                                    | BIOCARTA_TCR_PATHWAY                                                              |
| 22 |  |                                                    | LI_INDUCED_T_TO_NATURAL_KILLER_UP                                                 |
| 23 |  |                                                    | MARSON_BOUND_BY_FOXP3_UNSTIMULATED                                                |
| 24 |  |                                                    | HUTTMANN_B_CLL_POOR_SURVIVAL_UP                                                   |
| 25 |  |                                                    | REACTOME_GPCR_LIGAND_BINDING                                                      |
| 26 |  |                                                    | REACTOME_IMMUNOREGULATORY_INTERACTIONS_BETWEEN_A_LYMPHOID_AND_A_NON_LYMPHOID_CELL |
| 27 |  |                                                    | WANG_RESPONSE_TO_GSK3_INHIBITOR_SB216763_UP                                       |
| 28 |  |                                                    | BIOCARTA_GSK3_PATHWAY                                                             |
| 29 |  |                                                    | REACTOME_ACTIVATION_OF_IRF3_IRF7_MEDIATED_BY_TBK1_IKK_EPSILON                     |

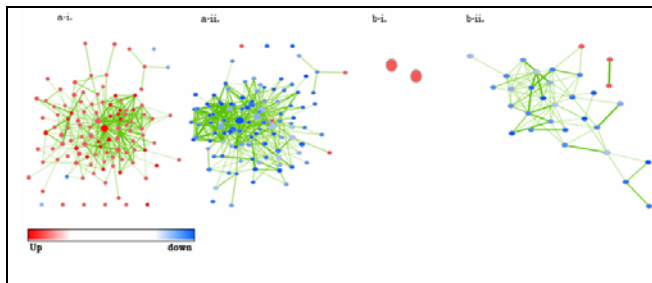

**Supplementary Dataset6-Fig.2. GSEA based pathway analysis for Set1-s (n=55) visualized as network (p value<0.05) for two subtypes of (a) GBM and (b) LUAD.**

**Supplementary Dataset6-Table2. Set1-s associated pathways in 2 classes of GBM and LUAD**

| NO. | GBM                                                    |                                                        | LUAD                                           |
|-----|--------------------------------------------------------|--------------------------------------------------------|------------------------------------------------|
|     | Class 1                                                | Class 2                                                | Class 2                                        |
| 1   | KEGG_FC_GAMMA_R_MEDIATED_PHAGOCYTOSIS                  | KEGG_FC_GAMMA_R_MEDIATED_PHAGOCYTOSIS                  | BASSO_B_LYMPHOCYTE_NETWORK                     |
| 2   | WANG_RESPONSE_TO_GSK3_INHIBITOR_SB216763_UP            | WANG_RESPONSE_TO_GSK3_INHIBITOR_SB216763_UP            | PANGAS_TUMOR_SUPPRESSION_BY_SMAD1_AND_SMAD5_UP |
| 3   | SIG_PIP3_SIGNALING_IN_B_LYMPHOCYTES                    | SIG_PIP3_SIGNALING_IN_B_LYMPHOCYTES                    | MARZEC_IL2_SIGNALING_DN                        |
| 4   | ZHENG_FOXP3_TARGETS_IN_T_LYMPHOCYTE_DN                 | ZHENG_FOXP3_TARGETS_IN_T_LYMPHOCYTE_DN                 | HAMAI_APOPTOSIS_VIA_TRAIL_UP                   |
| 5   | ST_T_CELL_SIGNAL_TRANSDUCTION                          | RAY_TARGETS_OF_P210_BCR_ABL_FUSION_DN                  | KAMIKUBO_MYELOID_CEBPA_NETWORK                 |
| 6   | PID_PI3KPATHWAY                                        | KEGG_FC_EPSILON_RI_SIGNALING_PATHWAY                   |                                                |
| 7   | KEGG_B_CELL_RECEPTOR_SIGNALING_PATHWAY                 | MARTENS_BOUND_BY_PML_RARA_FUSION                       |                                                |
| 8   | REACTOME_PLATELET_ACTIVATION_SIGNALING_AND_AGGREGATION | POOLA_INVASIVE_BREAST_CANCER_UP                        |                                                |
| 9   | PILON_KLF1_TARGETS_DN                                  | REACTOME_PLATELET_ACTIVATION_SIGNALING_AND_AGGREGATION |                                                |
| 10  | PID_TCR_PATHWAY                                        | OKAMOTO_LIVER_CANCER_MULTICENTRIC_OCCURRENCE_UP        |                                                |
| 11  | KEGG_FC_EPSILON_RI_SIGNALING_PATHWAY                   | REACTOME_SIGNALING_BY_RHO_GTPASES                      |                                                |



|    | THWAY                                                                                 |                                                                                       |  |
|----|---------------------------------------------------------------------------------------|---------------------------------------------------------------------------------------|--|
| 12 | REACTOME_ANTIGEN_ACTIVATES_B_CELL_RECEPTOR_LEADING_TO_GENERATION_OF_SECOND_MESSENGERS | ST_T_CELL_SIGNAL_TRANSDUCTION                                                         |  |
| 13 | SIG_BCR_SIGNALING_PATHWAY                                                             | WIERENGA_STAT5A_TARGETS_DN                                                            |  |
| 14 | REACTOME_TOLL_RECEPTOR_CASCADES                                                       | THEILGAARD_NEUTROPHIL_AT_SKIN_WOUND_DN                                                |  |
| 15 | KEGG_LEUKOCYTE_TRANSENDOTHELIAL_MIGRATION                                             | SIG_BCR_SIGNALING_PATHWAY                                                             |  |
| 16 | KEGG_ARACHIDONIC_ACID_METABOLISM                                                      | PILON_KLF1_TARGETS_DN                                                                 |  |
| 17 | THEILGAARD_NEUTROPHIL_AT_SKIN_WOUND_DN                                                | KEGG_LEUKOCYTE_TRANSENDOTHELIAL_MIGRATION                                             |  |
| 18 | LEE_DIFFERENTIATING_T_LYMPHOCYTE                                                      | REACTOME_TOLL_RECEPTOR_CASCADES                                                       |  |
| 19 | HASLINGER_B_CLL_WITH_13Q14_DELETION                                                   | REACTOME_TCR_SIGNALING                                                                |  |
| 20 | YAGI_AML_FAB_MARKERS                                                                  | REACTOME_ANTIGEN_ACTIVATES_B_CELL_RECEPTOR_LEADING_TO_GENERATION_OF_SECOND_MESSENGERS |  |
| 21 | REACTOME_TCR_SIGNALING                                                                | LEE_DIFFERENTIATING_T_LYMPHOCYTE                                                      |  |
| 22 | BOHN_PRIMARY_IMMUNODEFICIENCY_SYNDROME_DN                                             | LU_IL4_SIGNALING                                                                      |  |
| 23 | REACTOME_ADAPTIVE_IMMUNE_SYSTEM                                                       | KAMIKUBO_MYELOID_CEBPA_NETWORK                                                        |  |
| 24 | GAVIN_FOXP3_TARGETS_CLUSTER_T7                                                        | HOFFMANN_SMALL_PRE_BII_TO_IMMATURE_B_LYMPHOCYTE_DN                                    |  |
| 25 | ZHOU_INFLAMMATORY_RESPONSE_FINAL_DN                                                   | ZHOU_INFLAMMATORY_RESPONSE_FINAL_DN                                                   |  |
| 26 | REACTOME_REGULATION_OF_SIGNALING_BY_CBL                                               | BOHN_PRIMARY_IMMUNODEFICIENCY_SYNDROME_DN                                             |  |
| 27 |                                                                                       | GAVIN_FOXP3_TARGETS_CLUSTER_T7                                                        |  |
| 28 |                                                                                       | MORI_LARGE_PRE_BII_LYMPHOCYTE_DN                                                      |  |
| 29 |                                                                                       | HADDAD_T_LYMPHOCYTE_AND_NK_PROGENITOR_DN                                              |  |
| 30 |                                                                                       | REACTOME_ADAPTIVE_IMMUNE_SYSTEM                                                       |  |
| 31 |                                                                                       | YAGI_AML_FAB_MARKERS                                                                  |  |

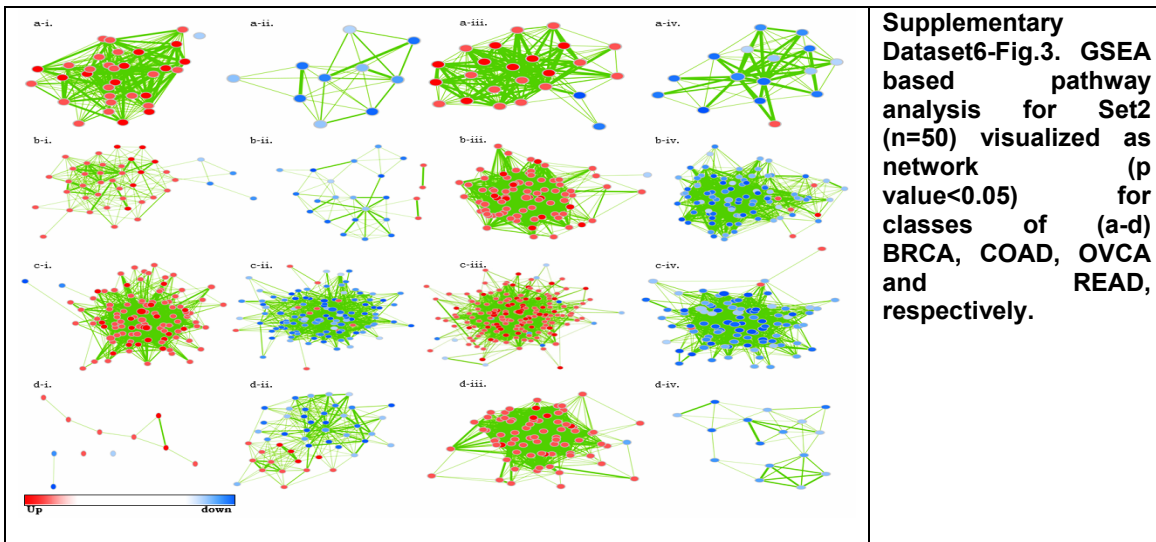

**Supplementary Dataset6-Table3. Set2 associated Pathways in 4 classes of BRCA-COAD-OVCA-READ**

| NO.         | Class 1                  | Class 2                                     | Class 3                       | Class 4                      |
|-------------|--------------------------|---------------------------------------------|-------------------------------|------------------------------|
| <b>BRCA</b> |                          |                                             |                               |                              |
| 1           | ALONSO_METASTASIS_UP     | HIRSCH_CELLULAR_TRANSFORMATION_SIGNATURE_DN | KEGG_ECM_RECEPTOR_INTERACTION | ELVIDGE_HYPOXIA_BY_DMOG_UP   |
| 2           | ALONSO_METASTASIS_EMT_UP | WOO_LIVER_CANCER_RECURRENT_UP               | KEGG_FOCAL_ADHESION           | RHODES_CANCER_META_SIGNATURE |

|             |                                                                          |                                                     |                                                    |                                                          |
|-------------|--------------------------------------------------------------------------|-----------------------------------------------------|----------------------------------------------------|----------------------------------------------------------|
| 3           | WESTON_VEGFA_TARGETS_12HR                                                |                                                     | MILI_PSEUDOPODIA_CHEMOTAXIS_DN                     |                                                          |
| 4           | WESTON_VEGFA_TARGETS                                                     |                                                     | PID_INTEGRIN_A4B1_PATHWAY                          |                                                          |
| 5           | WESTON_VEGFA_TARGETS_6HR                                                 |                                                     | PID_INTEGRIN1_PATHWAY                              |                                                          |
| 6           |                                                                          |                                                     | CHANDRAN_METASTASIS_UP                             |                                                          |
| 7           |                                                                          |                                                     | GRAESSMANN_RESPONSE_TO_MC_AND_SERUM_DEPRIVATION_UP |                                                          |
| <b>COAD</b> |                                                                          |                                                     |                                                    |                                                          |
| 1           | WESTON_VEGFA_TARGETS_3HR                                                 | KEGG_GLYCOSAMINOGLYCAN_BIOSYNTHESIS_HEPARAN_SULFATE | PID_AVB3_INTEGRIN_PATHWAY                          | REACTOME_CS_DS_DEGRADATION                               |
| 2           | SANA_TNF_SIGNALING_DN                                                    | REACTOME_HS_GAG_BIOSYNTHESIS                        | REACTOME_EXTRACELLULAR_MATRIX_ORGANIZATION         | REACTOME_CHONDROITIN_SULFATE_BIOSYNTHESIS                |
| 3           | RHODES_CANCER_METADATA_SIGNATURE                                         | REACTOME_DEGRADATION_OF_THE_EXTRACELLULAR_MATRIX    | REACTOME_COLLAGEN_FORMATION                        | REACTOME_CHONDROITIN_SULFATE_DERMATAN_SULFATE_METABOLISM |
| 4           | REACTOME_CS_DS_DEGRADATION                                               |                                                     | KEGG_ECM_RECEPTOR_INTERACTION                      | WESTON_VEGFA_TARGETS_6HR                                 |
| 5           | REACTOME_CHONDROITIN_SULFATE_BIOSYNTHESIS                                |                                                     | REACTOME_NCAM1_INTERACTIONS                        | WESTON_VEGFA_TARGETS                                     |
| 6           | REACTOME_CHONDROITIN_SULFATE_DERMATAN_SULFATE_METABOLISM                 |                                                     | REACTOME_NCAM_SIGNALING_FOR_NEURITE_OUT_GROWTH     | WESTON_VEGFA_TARGETS_3HR                                 |
| 7           | REACTOME_A_TETRASACCHARIDE_LINKER_SEQUENCE_IS_REQUIRED_FOR_GAG_SYNTHESIS |                                                     | KEGG_FOCAL_ADHESION                                | REACTOME_HEPARIN_SULFATE_HEPARIN_HS_GAG_METABOLISM       |
| 8           | ALONSO_METASTASIS_EMT_UP                                                 |                                                     | PID_INTEGRIN1_PATHWAY                              | REACTOME_GLYCOSAMINOGLYCAN_METABOLISM                    |
| 9           | ALONSO_METASTASIS_UP                                                     |                                                     | KEGG_TGF_BETA_SIGNALING_PATHWAY                    | SANA_TNF_SIGNALING_DN                                    |
| 10          | VERRECCHIA_RESPONSE_TO_TGFB1_C1                                          |                                                     | WOO_LIVER_CANCER_RECURRENCE_UP                     | VERRECCHIA_RESPONSE_TO_TGFB1_C5                          |
| 11          |                                                                          |                                                     |                                                    | REACTOME_CELL_CELL_COMMUNICATION                         |
| 12          |                                                                          |                                                     |                                                    | REACTOME_CELL_JUNCTION_ORGANIZATION                      |
| 13          |                                                                          |                                                     |                                                    | WEIGEL_OXIDATIVE_STRESS_BY_TBH_AND_H2O2                  |
| <b>OVCA</b> |                                                                          |                                                     |                                                    |                                                          |
| 1           | PID_INTEGRIN1_PATHWAY                                                    | CLASPER_LYMPHATIC_VESSELS_DURING_METASTASIS_DN      | SUNG_METASTASIS_STROMA_UP                          | POOLA_INVASIVE_BREAST_CANCER_UP                          |
| 2           | VERRECCHIA_DELAYED_RESPONSE_TO_TGFB1                                     | JECHLINGER_EPITHELIAL_TO_MESENCHYMAL_TRANSITION_UP  | LU_TUMOR_VASCULATURE_UP                            | PID_INTEGRIN1_PATHWAY                                    |
| 3           | KARAKAS_TGFB1_SIGNALING                                                  | WANG_TUMOR_INVASIVENESS_DN                          | REACTOME_COLLAGEN_FORMATION                        | VERRECCHIA_DELAYED_RESPONSE_TO_TGFB1                     |
| 4           | WANG_TUMOR_INVASIVENESS_UP                                               | WESTON_VEGFA_TARGETS_12HR                           | PID_SYNDECAN_1_PATHWAY                             | KEGG_ECM_RECEPTOR_INTERACTION                            |
| 5           | VERRECCHIA_RESPONSE_TO_TGFB1_C5                                          | REACTOME_PLATELET_ADHESION_TO_EXPOSED_COLLAGEN      | PID_INTEGRIN1_PATHWAY                              | ZHANG_RESPONSE_TO_IKK_INHIBITOR_AND_TNF_UP               |
| 6           | WESTON_VEGFA_TARGETS                                                     | BIDUS_METASTASIS_DN                                 | VERRECCHIA_EARLY_RESPONSE_TO_TGFB1                 | KEGG_FOCAL_ADHESION                                      |
| 7           | WESTON_VEGFA_TARGETS_6HR                                                 | SCHUETZ_BREAST_CANCER_DUCTAL_INVASIVE_UP            | VERRECCHIA_RESPONSE_TO_TGFB1_C2                    | CHANDRAN_METASTASIS_UP                                   |
| 8           | KEGG_ECM_RECEPTOR_INTERACTION                                            | PID_INTEGRIN1_PATHWAY                               | REACTOME_EXTRACELLULAR_MATRIX_ORGANIZATION         | VERRECCHIA_EARLY_RESPONSE_TO_TGFB1                       |
| 9           | PID_SYNDECAN_4_PATHWAY                                                   | WESTON_VEGFA_TARGETS_6HR                            | KEGG_ECM_RECEPTOR_INTERACTION                      | VERRECCHIA_RESPONSE_TO_TGFB1_C5                          |
| 10          | PID_INTEGRIN3_PATHWAY                                                    | SHI_SPARC_TARGETS_DN                                | PID_INTEGRIN3_PATHWAY                              | REACTOME_SIGNALING_BY_PDGFR                              |
| 11          | GILDEA_METASTASIS                                                        | ONDER_CDH1_TARGETS_2_UP                             | PID_AVB3_INTEGRIN_PATHWAY                          | KARAKAS_TGFB1_SIGNALING                                  |
| 12          | REACTOME_CS_DS_DEGRADATION                                               | REACTOME_SIGNALING_BY_PDGF                          | REACTOME_SIGNALING_BY_PDGFR                        | REACTOME_EXTRACELLULAR_MATRIX_ORGANIZATION               |
| 13          | REACTOME_CHONDROITIN_SULFATE_BIOSYNTHESIS                                | WESTON_VEGFA_TARGETS                                | REACTOME_NCAM1_INTERACTIONS                        | VERRECCHIA_RESPONSE_TO_TGFB1_C2                          |
| 14          |                                                                          | REACTOME_NCAM1_INTERACT                             | MISHRA_CARCINOMA_ASSOCIAT                          | PID_INTEGRIN3_PATHWAY                                    |

|             |                                           |                                            |                                                         |                                                                          |
|-------------|-------------------------------------------|--------------------------------------------|---------------------------------------------------------|--------------------------------------------------------------------------|
|             |                                           | IONS                                       | ED_FIBROBLAST_UP                                        |                                                                          |
| 15          |                                           | PID_INTEGRIN3_PATHWAY                      | KEGG_FOCAL_ADHESION                                     | MISHRA_CARCINOMA_ASSOCIATED_FIBROBLAST_UP                                |
| 16          |                                           | AMIT_EGF_RESPONSE_60_MCF10A                | CLASPER_LYMPHATIC_VESSELS_DURING_METASTASIS_DN          | PID_SYNDECAN_1_PATHWAY                                                   |
| 17          |                                           | AMIT_EGF_RESPONSE_60_HELNA                 | CHANDRAN_METASTASIS_UP                                  | WESTON_VEGFA_TARGETS_6HR                                                 |
| 18          |                                           |                                            | RAMASWAMY_METASTASIS_UP                                 | PID_SYNDECAN_4_PATHWAY                                                   |
| 19          |                                           |                                            | ROY_WOUND_BLOOD_VESSEL_UP                               | WANG_TUMOR_INVASIVENESS_UP                                               |
| 20          |                                           |                                            | QI_HYPOXIA                                              | LU_TUMOR_VASCULATURE_UP                                                  |
| 21          |                                           |                                            | LIAO_METASTASIS                                         |                                                                          |
| 22          |                                           |                                            | WESTON_VEGFA_TARGETS                                    |                                                                          |
| 23          |                                           |                                            | ONDER_CDH1_TARGETS_2_UP                                 |                                                                          |
| 24          |                                           |                                            | ZHANG_RESPONSE_TO_IKK_INHIBITOR_AND_TNF_UP              |                                                                          |
| 25          |                                           |                                            | QI_HYPOXIA_TARGETS_OF_HIF1A_AND_FOXA2                   |                                                                          |
| 26          |                                           |                                            | WANG_TUMOR_INVASIVENESS_UP                              |                                                                          |
| 27          |                                           |                                            | WESTON_VEGFA_TARGETS_6HR                                |                                                                          |
| 28          |                                           |                                            | ODONNELL_METASTASIS_DN                                  |                                                                          |
| 29          |                                           |                                            | REACTOME_BIOLOGICAL_OXIDATIONS                          |                                                                          |
| <b>READ</b> |                                           |                                            |                                                         |                                                                          |
| 1           | MISHRA_CARCINOMA_ASSOCIATED_FIBROBLAST_UP | REACTOME_HS_GAG_BIOSYNTHESIS               | REACTOME_CELL_SURFACE_INTERACTIONS_AT_THE_VASCULAR_WALL | SANA_TNF_SIGNALING_DN                                                    |
| 2           |                                           | PLASARI_TGFB1_TARGETS_10HR_DN              | KEGG_ECM_RECEPTOR_INTERACTION                           | REACTOME_CHONDROITIN_SULFATE_DERMATAN_SULFATE_METABOLISM                 |
| 3           |                                           | SANA_TNF_SIGNALING_UP                      | WANG_TUMOR_INVASIVENESS_UP                              | REACTOME_A_TETRASACCHARIDE_LINKER_SEQUENCE_IS_REQUIRED_FOR_GAG_SYNTHESIS |
| 4           |                                           | REACTOME_EXTRACELLULAR_MATRIX_ORGANIZATION | PID_INTEGRIN1_PATHWAY                                   | REACTOME_CS_DS_DEGRADATION                                               |
| 5           |                                           |                                            | LIAO_METASTASIS                                         | REACTOME_CHONDROITIN_SULFATE_BIOSYNTHESIS                                |
| 6           |                                           |                                            | KEGG_FOCAL_ADHESION                                     |                                                                          |
| 7           |                                           |                                            | PID_INTEGRIN3_PATHWAY                                   |                                                                          |
| 8           |                                           |                                            | KEGG_TGF_BETA_SIGNALING_PATHWAY                         |                                                                          |
| 9           |                                           |                                            | REACTOME_INTEGRIN_CELL_SURFACE_INTERACTIONS             |                                                                          |
| 10          |                                           |                                            | VERRECCHIA_EARLY_RESPONSE_TO_TGFB1                      |                                                                          |
| 11          |                                           |                                            | QI_HYPOXIA                                              |                                                                          |
| 12          |                                           |                                            | CHANDRAN_METASTASIS_UP                                  |                                                                          |
| 13          |                                           |                                            | REACTOME_SIGNALING_BY_PDGF                              |                                                                          |

## Supplementary Dataset7. Risk assessment of genes

The different classes resolved with 44 classifiers were subjected to risk assessment for all Set1, Set1-s and Set2genes using the survival analysis tool in BRB, which assigns proportional hazard ratio to each gene. Cox proportional hazards model and Wald Statistic test were used followed by calculation of hazard ratio for a two-fold change in normalized gene expression levels. Supplementary Dataset7-Table1 lists genes having significant correlation between expression pattern and survival of patient; classifiers that were thus predicted as risk genes are highlighted in red text.

Further, Kaplan Meier survival analysis plots were generated for each individual risk gene ( $p \leq 0.01$  and hazard ratio  $> 1$ ) followed by log rank test. Thus, 23 risk genes were identified in BRCA, 18 in COAD, 12 in OVCA, 39 in READ and 37 in GBM patients (Supplementary Dataset7-Figs. 1-5 respectively; Supplementary Dataset7-Table1). At this defined threshold, only two genes were found to be significant for LUAD cancer patients, however by relaxing stringency ( $p < 0.05$  and hazard ratio  $> 1$ ) 26 risk genes were identified for LUAD (Supplementary Dataset7-Fig.6; Supplementary Dataset7-Table1).

**Supplementary Dataset7-Table1. Risk assessment of genes – red highlights indicate classifiers**

| No.                                          | Genes    | Log rank test p value | Hazard Ratio | SD of log intensities | Sr.No.                                       | Genes    | Log rank test p value | Hazard Ratio | SD of log intensities |
|----------------------------------------------|----------|-----------------------|--------------|-----------------------|----------------------------------------------|----------|-----------------------|--------------|-----------------------|
| <b>BRCA (p value <math>\leq 0.01</math>)</b> |          |                       |              |                       | <b>OVCA (p value <math>\leq 0.01</math>)</b> |          |                       |              |                       |
| 1                                            | ITGA11   | 0                     | 1.214        | 1.502                 | 1                                            | TNFSF4   | 0                     | 1.212        | 1.276                 |
| 2                                            | WISP1    | 0                     | 1.115        | 1.349                 | 2                                            | SGIP1    | 0.001                 | 1.292        | 0.838                 |
| 3                                            | SPON2    | 0.002                 | 1.248        | 1.352                 | 3                                            | SPON2    | 0.002                 | 1.146        | 1.348                 |
| 4                                            | NOX4     | 0.002                 | 1.248        | 1.43                  | 4                                            | CTSK     | 0.004                 | 1.088        | 1.844                 |
| 5                                            | COL5A2   | 0.002                 | 1.172        | 1.482                 | 5                                            | RNASE6   | 0.006                 | 1.103        | 1.319                 |
| 6                                            | COL3A1   | 0.002                 | 1.242        | 0.88                  | 6                                            | COL3A1   | 0.008                 | 1.117        | 1.445                 |
| 7                                            | INHBA    | 0.002                 | 1.152        | 1.362                 | 7                                            | SPOCD1   | 0.01                  | 1.287        | 0.827                 |
| 8                                            | CTSK     | 0.002                 | 1.145        | 1.219                 | 8                                            | COL11A1  | 0.01                  | 1.065        | 2.873                 |
| 9                                            | SGIP1    | 0.003                 | 1.275        | 1.048                 | 9                                            | THBS2    | 0.01                  | 1.087        | 2.033                 |
| 10                                           | FAP      | 0.003                 | 1.159        | 1.523                 | 10                                           | RGS1     | 0.01                  | 1.09         | 1.822                 |
| 11                                           | ADAM12   | 0.003                 | 1.148        | 1.388                 | 11                                           | DIO2     | 0.01                  | 1.089        | 1.309                 |
| 12                                           | MMP11    | 0.003                 | 1.155        | 1.21                  | 12                                           | COL10A1  | 0.01                  | 1.05         | 2.079                 |
| 13                                           | F2R      | 0.004                 | 1.37         | 1.006                 | <b>READ (p value <math>\leq 0.01</math>)</b> |          |                       |              |                       |
| 14                                           | COL12A1  | 0.005                 | 1.188        | 1.511                 | 1                                            | CLC      | 0                     | 1.399        | 2.187                 |
| 15                                           | P4HA3    | 0.005                 | 1.193        | 1.242                 | 2                                            | CTSK     | 0                     | 1.581        | 0.932                 |
| 16                                           | PPEF1    | 0.007                 | 1.205        | 1.383                 | 3                                            | NCF2     | 0                     | 1.325        | 1.091                 |
| 17                                           | THBS2    | 0.007                 | 1.14         | 1.656                 | 4                                            | CTHRC1   | 0.001                 | 1.303        | 1.535                 |
| 18                                           | CHSY-2   | 0.008                 | 1.195        | 1.23                  | 5                                            | COL6A3   | 0.002                 | 1.963        | 0.772                 |
| 19                                           | COL5A1   | 0.009                 | 1.155        | 1.35                  | 6                                            | RAB42    | 0.002                 | 1.632        | 0.931                 |
| 20                                           | WNT2     | 0.009                 | 1.104        | 1.669                 | 7                                            | COL12A1  | 0.002                 | 1.448        | 1.072                 |
| 21                                           | CTHRC1   | 0.01                  | 1.152        | 1.674                 | 8                                            | IL7R     | 0.002                 | 1.188        | 0.952                 |
| 22                                           | PPAPDC1A | 0.01                  | 1.118        | 1.93                  | 9                                            | HLA-DPB1 | 0.003                 | 1.462        | 1.019                 |
| 23                                           | VCAN     | 0.01                  | 1.118        | 1.481                 | 10                                           | CLEC4A   | 0.003                 | 1.285        | 1.106                 |
| <b>COAD (p value <math>\leq 0.01</math>)</b> |          |                       |              |                       | 11                                           | WISP1    | 0.003                 | 1.326        | 0.873                 |
| 1                                            | IL7R     | 0.005                 | 1.278        | 1.105                 | 12                                           | CLEC12A  | 0.003                 | 1.449        | 0.626                 |
| 2                                            | CLC      | 0.007                 | 1.304        | 2.257                 | 13                                           | TLR1     | 0.003                 | 1.216        | 1.095                 |
| 3                                            | PTPN22   | 0.008                 | 1.353        | 0.713                 | 14                                           | F2R      | 0.004                 | 1.926        | 0.646                 |
| 4                                            | SAMSN1   | 0.009                 | 1.365        | 1.176                 | 15                                           | SAMSN1   | 0.004                 | 1.277        | 1.084                 |
| 5                                            | CD86     | 0.01                  | 1.549        | 1.085                 | 16                                           | ARHGAP15 | 0.004                 | 1.321        | 0.802                 |
| 6                                            | VNN2     | 0.01                  | 1.252        | 1.761                 | 17                                           | PLEK     | 0.005                 | 1.273        | 1.121                 |
| 7                                            | PLEK     | 0.01                  | 1.353        | 1.228                 | 18                                           | ITGB2    | 0.005                 | 1.354        | 0.831                 |
| 8                                            | CLEC4A   | 0.01                  | 1.377        | 1.165                 | 19                                           | LAPTM5   | 0.005                 | 1.272        | 0.924                 |
| 9                                            | EDG6     | 0.01                  | 1.465        | 1.046                 | 20                                           | CYBB     | 0.005                 | 1.278        | 0.908                 |
| 10                                           | LCP2     | 0.01                  | 1.399        | 1.049                 | 21                                           | CD53     | 0.006                 | 1.3          | 1.175                 |
| 11                                           | CD53     | 0.01                  | 1.302        | 1.295                 | 22                                           | RGS18    | 0.006                 | 1.272        | 1.187                 |
| 12                                           | LILRB1   | 0.01                  | 1.393        | 1.012                 | 23                                           | FCGR2B   | 0.006                 | 1.216        | 1.475                 |
| 13                                           | ICOS     | 0.01                  | 1.405        | 0.913                 | 24                                           | PTPRC    | 0.006                 | 1.269        | 0.993                 |
| 14                                           | PSCD4    | 0.01                  | 1.459        | 0.772                 | 25                                           | PSTPIP1  | 0.006                 | 1.383        | 0.722                 |
| 15                                           | IL411    | 0.01                  | 1.326        | 0.95                  | 26                                           | CD33     | 0.007                 | 1.484        | 0.922                 |
| 16                                           | DOCK8    | 0.01                  | 1.383        | 0.76                  | 27                                           | ITGA4    | 0.008                 | 1.802        | 0.86                  |
| 17                                           | HLA-DPB1 | 0.01                  | 1.185        | 1.153                 | 28                                           | AIF1     | 0.01                  | 1.36         | 1.024                 |
| 18                                           | ITK      | 0.01                  | 1.17         | 0.689                 | 29                                           | EVI2A    | 0.01                  | 1.257        | 1.278                 |

| GBM (p value ≤ 0.01) |          |       |       |       | LUAD (p value < 0.05) |          |       |       |       |
|----------------------|----------|-------|-------|-------|-----------------------|----------|-------|-------|-------|
| 1                    | MNDA     | 0     | 1.164 | 1.588 | 30                    | SH2D1A   | 0.01  | 1.414 | 1.022 |
| 2                    | SIGLEC5  | 0     | 1.267 | 0.998 | 31                    | CD48     | 0.01  | 1.252 | 1.424 |
| 3                    | RGS18    | 0.001 | 1.198 | 1.474 | 32                    | LY86     | 0.01  | 1.335 | 0.953 |
| 4                    | LAIR1    | 0.001 | 1.205 | 1.255 | 33                    | POSTN    | 0.01  | 1.235 | 1.556 |
| 5                    | ARHGAP30 | 0.001 | 1.258 | 1.005 | 34                    | LCP2     | 0.01  | 1.303 | 0.939 |
| 6                    | HLA-DQB1 | 0.001 | 1.138 | 1.003 | 35                    | CD86     | 0.01  | 1.282 | 1.084 |
| 7                    | VNN2     | 0.002 | 1.172 | 1.416 | 36                    | CD72     | 0.01  | 1.361 | 0.924 |
| 8                    | CLEC4A   | 0.002 | 1.187 | 0.937 | 37                    | CD52     | 0.01  | 1.231 | 1.311 |
| 9                    | APOBEC3G | 0.003 | 1.258 | 0.974 | 38                    | SHOX2    | 0.01  | 1.441 | 0.613 |
| 10                   | PTPRC    | 0.003 | 1.183 | 1.16  | 39                    | CDH11    | 0.01  | 1.531 | 1.035 |
| 11                   | AIF1     | 0.003 | 1.133 | 1.446 | 1                     | SUCNR1   | 0.008 | 2.025 | 1.426 |
| 12                   | CD33     | 0.003 | 1.159 | 1.177 | 2                     | FCGR3A   | 0.01  | 2.215 | 0.847 |
| 13                   | EVI2B    | 0.003 | 1.078 | 1.105 | 3                     | LY86     | 0.02  | 1.915 | 1.006 |
| 14                   | PLEK     | 0.004 | 1.227 | 1.181 | 4                     | HLA-DRB5 | 0.02  | 1.769 | 0.912 |
| 15                   | TLR1     | 0.004 | 1.182 | 1.192 | 5                     | ARHGAP30 | 0.02  | 1.366 | 0.825 |
| 16                   | LCP2     | 0.004 | 1.221 | 0.927 | 6                     | FCGR2B   | 0.03  | 2.154 | 1.155 |
| 17                   | ITGB2    | 0.004 | 1.185 | 1.055 | 7                     | CD33     | 0.03  | 2.039 | 1.002 |
| 18                   | PTAFR    | 0.004 | 1.179 | 1.058 | 8                     | CD86     | 0.03  | 2.357 | 0.841 |
| 19                   | ARHGAP9  | 0.005 | 1.215 | 0.996 | 9                     | NCF2     | 0.03  | 1.875 | 0.966 |
| 20                   | HAVCR2   | 0.005 | 1.182 | 1.136 | 10                    | RNASE6   | 0.03  | 2.006 | 0.957 |
| 21                   | NCF2     | 0.006 | 1.209 | 1.135 | 11                    | LPXN     | 0.03  | 1.971 | 0.872 |
| 22                   | PSCDBP   | 0.006 | 1.123 | 1.103 | 12                    | AIF1     | 0.03  | 1.717 | 1.117 |
| 23                   | SIGLEC7  | 0.007 | 1.194 | 0.913 | 13                    | FCGR1A   | 0.03  | 1.836 | 0.975 |
| 24                   | CD53     | 0.007 | 1.127 | 1.331 | 14                    | BTK      | 0.03  | 1.82  | 0.874 |
| 25                   | CYBB     | 0.007 | 1.135 | 1.204 | 15                    | ARHGAP9  | 0.03  | 1.75  | 0.895 |
| 26                   | CD37     | 0.007 | 1.126 | 1.028 | 16                    | MNDA     | 0.03  | 1.423 | 1.365 |
| 27                   | LAPTM5   | 0.008 | 1.146 | 1.173 | 17                    | HAVCR2   | 0.03  | 1.704 | 0.924 |
| 28                   | LILRB1   | 0.009 | 1.232 | 1.093 | 18                    | CYBB     | 0.03  | 1.451 | 1.161 |
| 29                   | IFI30    | 0.009 | 1.135 | 1.293 | 19                    | LCP2     | 0.03  | 1.666 | 0.927 |
| 30                   | FCGR2B   | 0.01  | 1.142 | 1.71  | 20                    | LAPTM5   | 0.03  | 1.537 | 1.033 |
| 31                   | EBI2     | 0.01  | 1.144 | 1.522 | 21                    | PTPRC    | 0.03  | 1.643 | 0.931 |
| 32                   | NPL      | 0.01  | 1.197 | 0.974 | 22                    | NCKAP1L  | 0.03  | 1.577 | 0.871 |
| 33                   | APOBEC3A | 0.01  | 1.22  | 0.865 | 23                    | FYB      | 0.03  | 1.552 | 0.981 |
| 34                   | NCKAP1L  | 0.01  | 1.157 | 1.027 | 24                    | CD53     | 0.03  | 1.47  | 1.025 |
| 35                   | HLA-DRB5 | 0.01  | 1.111 | 1.156 | 25                    | PLEK     | 0.03  | 1.464 | 1.011 |
| 36                   | BTK      | 0.01  | 1.118 | 1.067 | 26                    | CD37     | 0.03  | 1.383 | 0.867 |
| 37                   | CD69     | 0.01  | 1.059 | 1.516 | -                     | -        | -     | -     | -     |

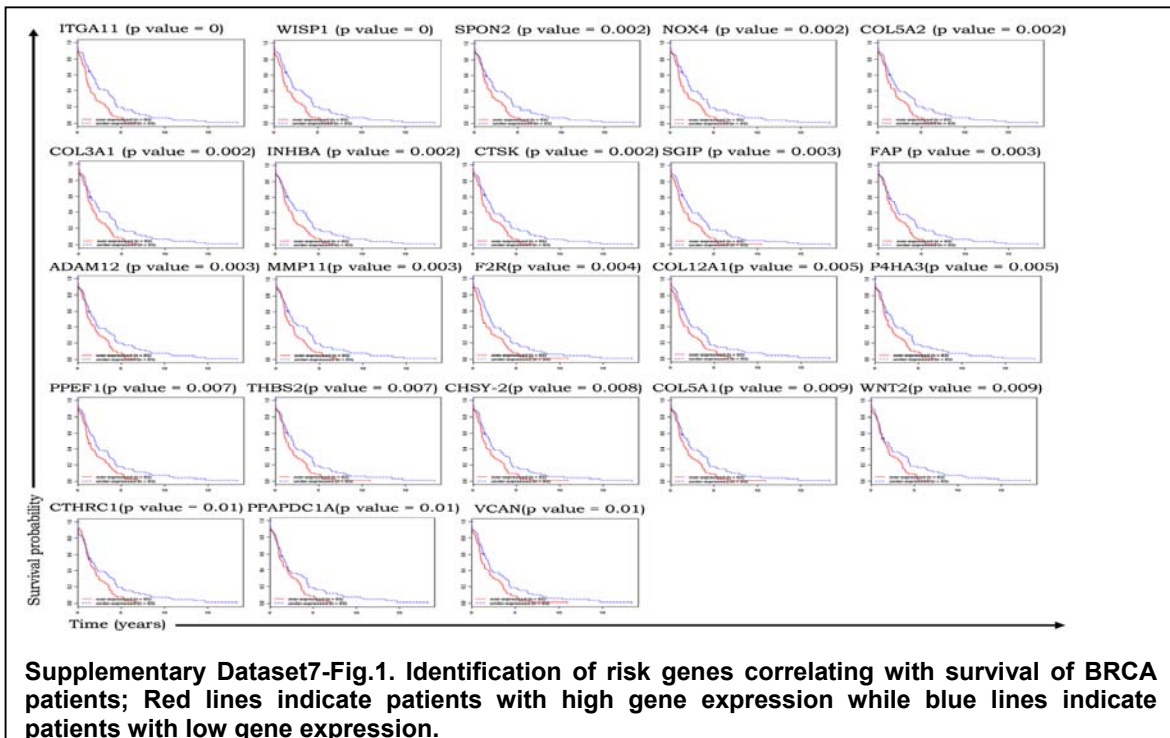

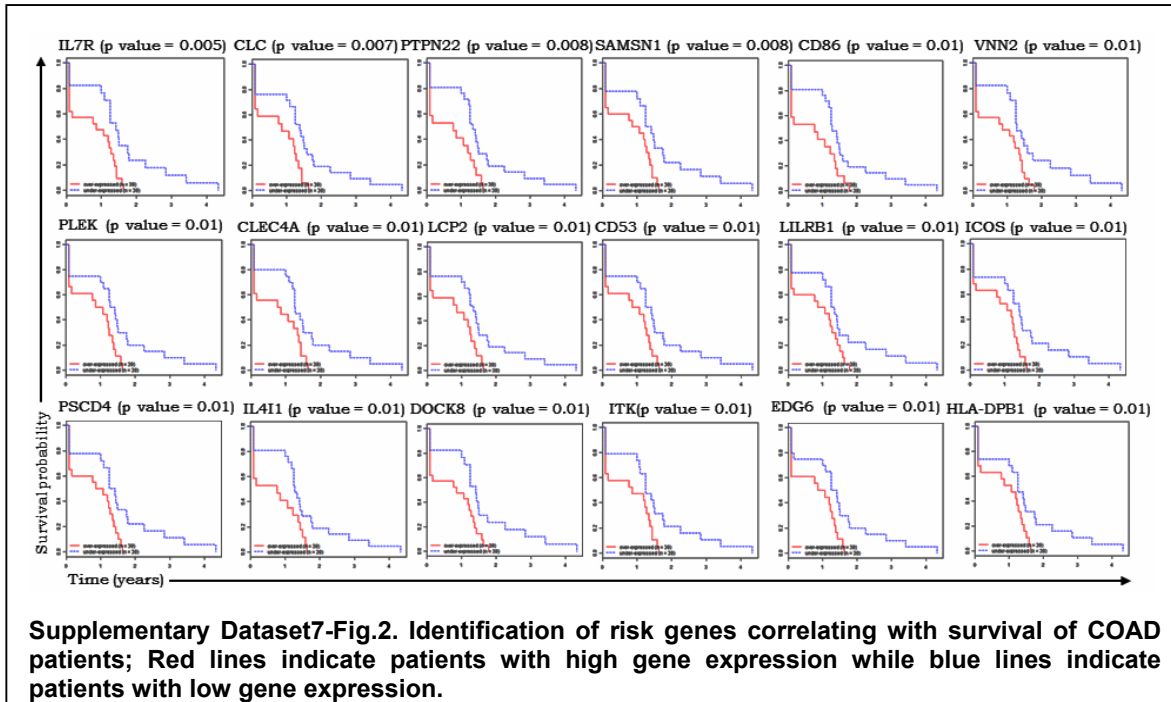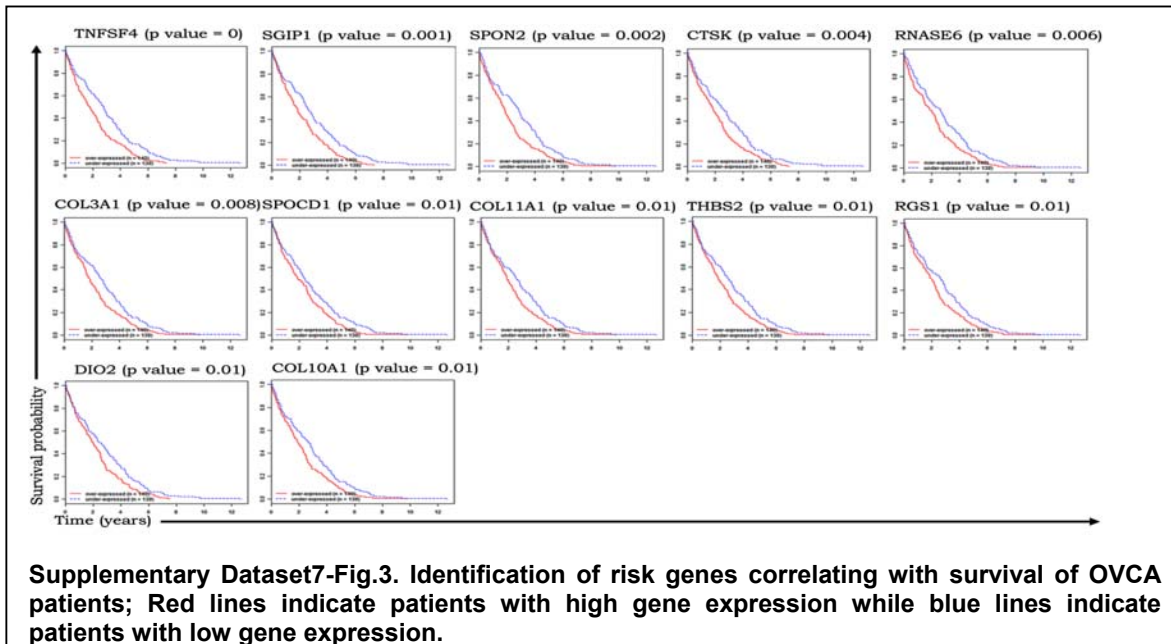

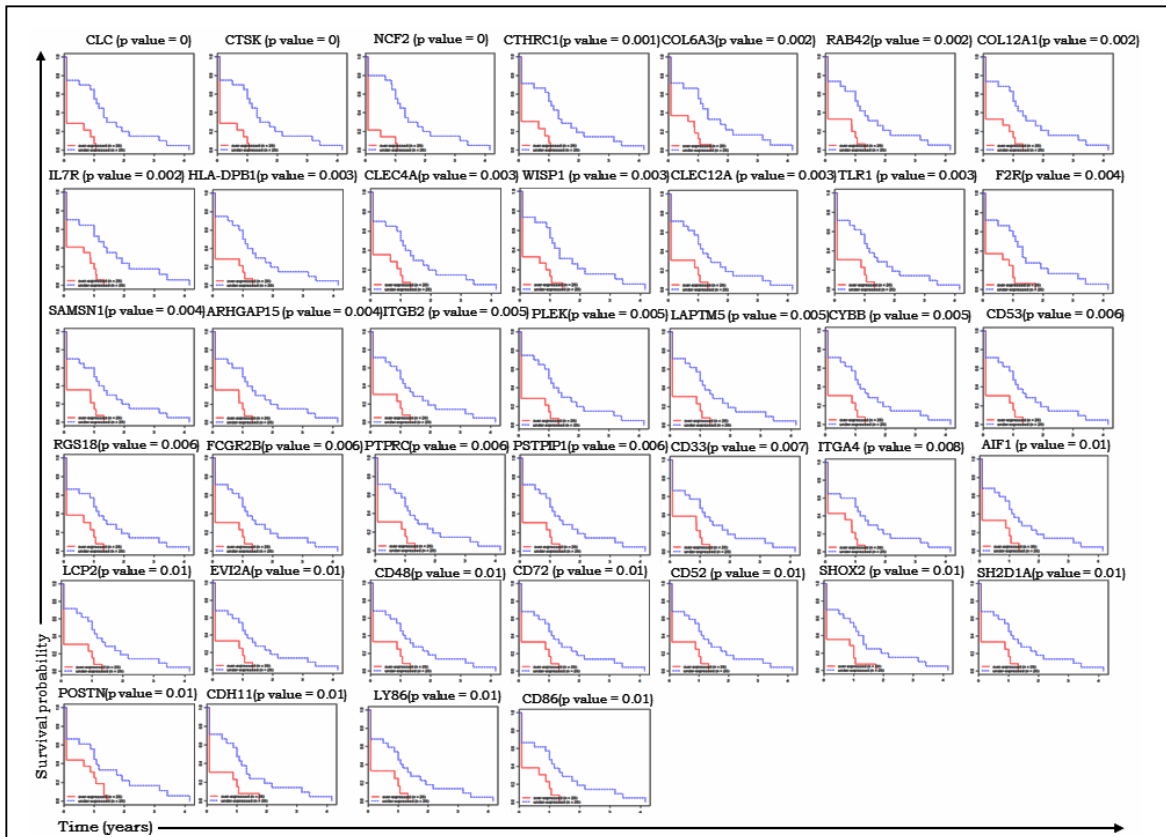

**Supplementary Dataset7-Fig.4. Identification of risk genes correlating with survival of READ patients; Red lines indicate patients with high gene expression while blue lines indicate patients with low gene expression.**

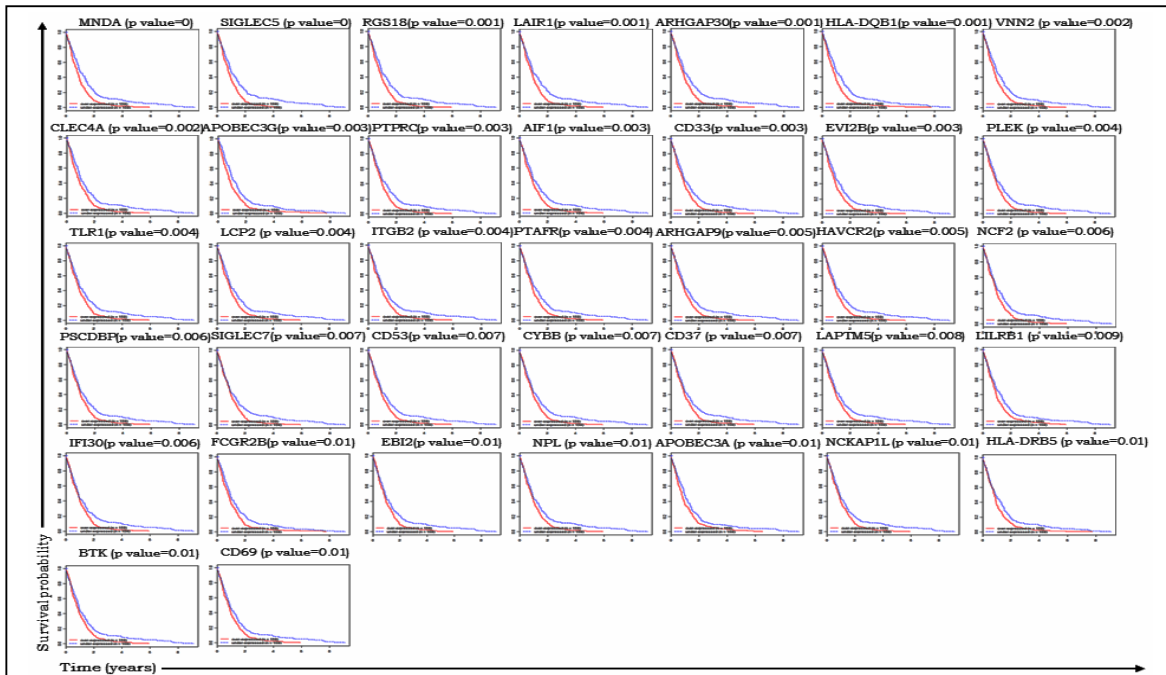

**Supplementary Dataset6-Fig.5. Identification of risk genes correlating with survival of GBM patients; Red lines indicate patients with high gene expression while blue lines indicate patients with low gene expression.**

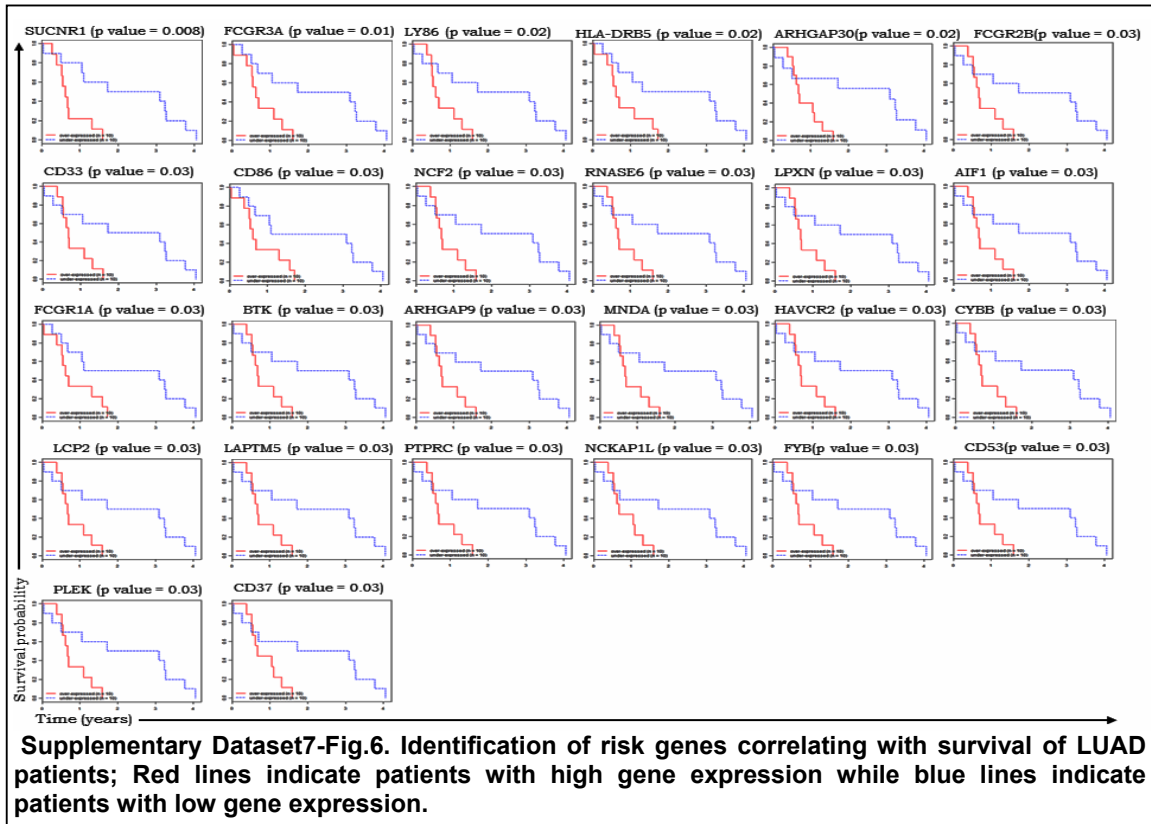

### Principal Component Analysis (PCA)

Expression of 6 common risk genes for COAD-READ-GBM-LUAD (*PLEK, LCP2, CD53, MND A, NCF2, CYBB*;  $p < 0.05$ ; Fig.4a-i) and 3 common risk genes for BRCA-OVCA-READ (*WISP1, CTSK, ADAM12*;  $p < 0.05$ ; Fig.4b-i) cancer patients were applied in PCA using Matlab software to identify association of risk genes across patients with different cancers. Weights of first three Principal Components (PCs) were as enlisted in Supplementary Dataset7-Table2.

**Supplementary Dataset7-Table2. Weights of risk genes for first three PCs.**

| COAD-READ-GBM-LUAD |                |                |                |
|--------------------|----------------|----------------|----------------|
| Genes              | Weights in PC1 | Weights in PC2 | Weights in PC3 |
| PLEK               | 0.4018         | -0.1402        | 0.1445         |
| LCP2               | 0.3225         | 0.0845         | 0.0366         |
| CD53               | 0.4294         | 0.401          | -0.3261        |
| MND A              | 0.5042         | -0.7767        | -0.088         |
| NCF2               | 0.3779         | 0.3043         | 0.7973         |
| CYBB               | 0.3913         | 0.3414         | -0.4774        |
| BRCA-OVCA-READ     |                |                |                |
| Genes              | Weights in PC1 | Weights in PC2 | Weights in PC3 |
| WISP1              | 0.508          | -0.5378        | 0.6729         |
| CTSK               | 0.6437         | 0.7561         | 0.1183         |
| ADAM12             | 0.5724         | -0.373         | -0.7302        |

### Evaluation of sensitivity and specificity

(i) **Individual risk genes of six cancers-** Computation of sensitivity and specificity for each cancer type carried out for predicted high and low risk patients using individual risk genes



( $p < 0.05$ ); K-M analysis for identified risk groups indicated that, expression pattern of individual risk genes can significantly predict patients with poor and better survival within six cancers (Supplementary Dataset7-Fig.7). Actual high and low risk patients were identified from TCGA data (Details are available Methods). Sensitivity and specificity of risk genes were computed for each cancer types and McNemar's test was used for statistical significance (Supplementary Dataset7-Table3).

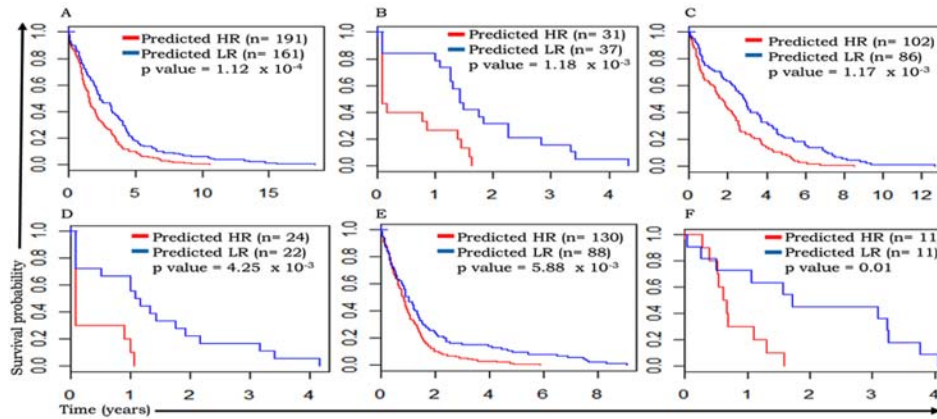

**Supplementary Dataset7-Fig.7.** Survival analysis of predicted risk groups based on differential expression of individual risk genes for (A-F) BRCA, COAD, OVCA, READ, GBM and LUAD, respectively.

**Supplementary Dataset7-Table3.** Calculation of sensitivity and specificity using individual risk genes.

| Cancer types | Number of Genes | Actual HR | Actual LR | Predicted HR | Predicted LR | Sensitivity (%) | Specificity (%) | p value               |
|--------------|-----------------|-----------|-----------|--------------|--------------|-----------------|-----------------|-----------------------|
| COAD         | 39              | 35        | 34        | 31           | 37           | 78.57142857     | 83.33333333     | 1                     |
| READ         | 62              | 25        | 13        | 24           | 22           | 66.66666667     | 90.90909091     | 0.3                   |
| GBM          | 46              | 482       | 72        | 130          | 97           | 64.24581006     | 61.76470588     | $1.21 \times 10^{-8}$ |
| LUAD         | 26              | 11        | 19        | 9            | 8            | 62.5            | 100             | 0.2482                |
| BRCA         | 38              | 290       | 142       | 192          | 164          | 62.76595745     | 58.65384615     | 0.01445               |
| OVCA         | 28              | 348       | 205       | 103          | 86           | 62.29508197     | 61.29032258     | 0.01207               |

(ii). **Common risk genes for cancers**-Differential expression pattern of 6 and 3 common risk genes for COAD-READ-GBM-LUAD and BRCA-OVCA-READ groups, respectively (Fig.4) were used for assignment of low and high risk to the patients. Sensitivity and specificity were calculated for common risk genes to predict patients with low or high risk for cancers of respective groups. READ cancer patient's risk groups were predicted by both 6 and 3 common risk genes. Common risk genes can significantly ( $p < 0.05$ ) predict high and low risk for GBM, BRCA and OVCA whereas sensitivities and specificities of COAD, READ and LUAD was not significant (Supplementary Dataset7-Table4).

**Supplementary Dataset7-Table4.** Calculation of sensitivity and specificity using common risk genes.

| Cancer types | Genes                             | Actual HR | Actual LR | Predicted HR | Predicted LR | Sensitivity (%) | Specificity (%) | p value                |
|--------------|-----------------------------------|-----------|-----------|--------------|--------------|-----------------|-----------------|------------------------|
| COAD         | PLEK, LCP2, CD53, MND, NCF2, CYBB | 36        | 35        | 36           | 81           | 57.14285714     | 80              | 0.1456                 |
| READ         |                                   | 25        | 13        | 22           | 22           | 60              | 90              | 0.3711                 |
| GBM          |                                   | 482       | 72        | 127          | 91           | 66.07142857     | 65.71428571     | $1.17 \times 10^{-7}$  |
| LUAD         | WISP1, CTSK, ADAM12               | 11        | 19        | 10           | 10           | 66.66666667     | 77.77777778     | 1                      |
| BRCA         |                                   | 290       | 142       | 191          | 171          | 59.09090909     | 55.78947368     | $1.282 \times 10^{-3}$ |
| OVCA         |                                   | 348       | 205       | 167          | 125          | 61.65803109     | 51.11111111     | $7.593 \times 10^{-3}$ |
| READ         |                                   | 25        | 13        | 21           | 21           | 61.53846154     | 90              | 0.2207                 |

(iii). **Common and most significant risk genes**-To enhance prognostic efficacy for COAD, READ and LUAD we combined common risk genes from both sets and/or individual risk genes. READ cancer patient's risk defined by common 6 (Set1) and 3 (Set2) risk genes and COAD and LUAD cancer patients were defined by using 6 common risk genes and most significant 3 genes from individual risk genes. These 15 genes were referred as prognostic signature panel indicated that, expression pattern can significantly ( $p < 0.05$ ) predict risk of COAD, READ, GBM, BRCA and OVCA cancer (Supplementary Dataset7-Table5).

**Supplementary Dataset7-Table5. Calculation of sensitivity and specificity using common risk genes and most significant genes for COAD, LUAD highlighted in red color.**

| Cancer types | Genes                                                    | Actual HR | Actual LR | Predicted HR | Predicted LR | Sensitivity (%) | Specificity (%) | p value                |
|--------------|----------------------------------------------------------|-----------|-----------|--------------|--------------|-----------------|-----------------|------------------------|
| COAD         | PLEK, LCP2, CD53, MNDA, NCF2, CYBB, IL7R, CLC, PTPN22    | 36        | 35        | 56           | 83           | 58.82352941     | 88              | 0.01529                |
| READ         | PLEK, LCP2, CD53, MNDA, NCF2, CYBB, WISP1, ADAM12, CTSK  | 25        | 13        | 29           | 27           | 55.55555556     | 88.88888889     | 0.0455                 |
| GBM          | PLEK, LCP2, CD53, MNDA, NCF2, CYBB                       | 482       | 72        | 127          | 91           | 66.07142857     | 65.71428571     | $1.17 \times 10^{-7}$  |
| LUAD         | PLEK, LCP2, CD53, MNDA, NCF2, CYBB, SUCNR1, FCGR3A, LY86 | 11        | 19        | 13           | 14           | 87.5            | 73.33333333     | 0.2207                 |
| BRCA         | WISP1, ADAM12, CTSK                                      | 290       | 142       | 191          | 171          | 59.09090909     | 55.78947368     | $1.282 \times 10^{-3}$ |
| OVCA         |                                                          | 348       | 205       | 167          | 125          | 61.65803109     | 51.11111111     | $7.59 \times 10^{-3}$  |

### Supplementary Dataset8. Risk assessment of GBOCRL- IIPr panel through re-sampling

Random sample selection in the six cancers (from TCGA dataset - Supplementary Dataset1-Table1) was carried out using R software to generate 100 random datasets (RDs) each for BRCA, OVCA and GBM (200 samples), COAD (120 samples), READ (50 samples) and LUAD (20 samples) as described in methods and references 46,48 of manuscript. Differential expression pattern of risk genes (GBOCRL- IIPr panel; Fig.6i) were used for assignment of low and high risk of the patients. K-M analysis performed with log rank test indicated that differential expression pattern of risk genes significantly correlated with prediction of low and high risk groups within the RDs (p value <0.05; Supplementary Dataset8-Table1). A weaker correlation of the 9 genes with low and high risk groups was obtained with LUAD resampling (51%) probably due to a very limited number of available samples in the dataset (n=20).

**Supplementary Dataset8-Table1. Statistical significance for survival difference in predicted low and high risk group of RDs for six cancers**

| BRCA<br>(69% ; p < 0.05) |         | COAD<br>(93% ; p < 0.05) |         | OVCA<br>(81% ; p < 0.05) |         | READ<br>(100% ; p < 0.05) |         | GBM<br>(99% ; p < 0.05) |          | LUAD<br>(51% ; p < 0.05) |         |
|--------------------------|---------|--------------------------|---------|--------------------------|---------|---------------------------|---------|-------------------------|----------|--------------------------|---------|
| Random Datasets          | p value | Random Datasets          | p value | Random Datasets          | p value | Random Datasets           | p value | Random Datasets         | p value  | Random Datasets          | p value |
| RD1                      | 0.0489  | RD1                      | 0.00738 | RD1                      | 0.303   | RD1                       | 0.0049  | RD1                     | 0.00858  | RD1                      | 0.0273  |
| RD2                      | 0.0535  | RD2                      | 0.00070 | RD2                      | 0.0246  | RD2                       | 0.0012  | RD2                     | 0.000514 | RD2                      | 0.0854  |
| RD3                      | 0.0893  | RD3                      | 0.0122  | RD3                      | 0.0757  | RD3                       | 0.0035  | RD3                     | 0.00109  | RD3                      | 0.00719 |
| RD4                      | 0.00059 | RD4                      | 0.0126  | RD4                      | 0.0015  | RD4                       | 0.0007  | RD4                     | 0.000952 | RD4                      | 0.0815  |
| RD5                      | 0.0164  | RD5                      | 0.00107 | RD5                      | 0.0405  | RD5                       | 0.0023  | RD5                     | 0.00139  | RD5                      | 0.00181 |
| RD6                      | 0.0401  | RD6                      | 0.0627  | RD6                      | 0.0398  | RD6                       | 0.0042  | RD6                     | 0.00365  | RD6                      | 0.0503  |
| RD7                      | 0.00595 | RD7                      | 0.00238 | RD7                      | 0.0006  | RD7                       | 0.0023  | RD7                     | 0.0012   | RD7                      | 0.184   |
| RD8                      | 0.0324  | RD8                      | 0.0168  | RD8                      | 0.013   | RD8                       | 0.0019  | RD8                     | 0.000349 | RD8                      | 0.0658  |
| RD9                      | 0.00741 | RD9                      | 0.0329  | RD9                      | 0.0028  | RD9                       | 0.0007  | RD9                     | 0.00306  | RD9                      | 0.0488  |
| RD10                     | 0.00977 | RD10                     | 0.0204  | RD10                     | 0.0066  | RD10                      | 0.0004  | RD10                    | 0.000666 | RD10                     | 0.0116  |
| RD11                     | 0.0223  | RD11                     | 0.0096  | RD11                     | 0.0023  | RD11                      | 0.0022  | RD11                    | 0.00148  | RD11                     | 0.0383  |
| RD12                     | 0.0251  | RD12                     | 0.00241 | RD12                     | 0.0147  | RD12                      | 0.0042  | RD12                    | 0.000314 | RD12                     | 0.0174  |
| RD13                     | 0.00144 | RD13                     | 0.0128  | RD13                     | 0.0126  | RD13                      | 0.0023  | RD13                    | 0.00241  | RD13                     | 0.162   |
| RD14                     | 0.055   | RD14                     | 0.0158  | RD14                     | 0.0163  | RD14                      | 0.0042  | RD14                    | 0.000525 | RD14                     | 0.00193 |
| RD15                     | 0.0656  | RD15                     | 0.0475  | RD15                     | 0.0193  | RD15                      | 0.0018  | RD15                    | 0.000997 | RD15                     | 0.147   |
| RD16                     | 0.314   | RD16                     | 0.0149  | RD16                     | 0.077   | RD16                      | 0.0015  | RD16                    | 0.0514   | RD16                     | 0.00304 |
| RD17                     | 0.0257  | RD17                     | 0.0214  | RD17                     | 0.0201  | RD17                      | 0.0018  | RD17                    | 0.0265   | RD17                     | 0.139   |
| RD18                     | 0.0278  | RD18                     | 0.0634  | RD18                     | 0.0226  | RD18                      | 0.0294  | RD18                    | 0.000838 | RD18                     | 0.0258  |
| RD19                     | 0.00969 | RD19                     | 0.00736 | RD19                     | 0.129   | RD19                      | 0.002   | RD19                    | 0.000134 | RD19                     | 0.0509  |
| RD20                     | 0.0036  | RD20                     | 0.0175  | RD20                     | 0.0241  | RD20                      | 0.0040  | RD20                    | 0.00313  | RD20                     | 0.173   |
| RD21                     | 0.00914 | RD21                     | 0.0221  | RD21                     | 0.124   | RD21                      | 0.0055  | RD21                    | 0.00295  | RD21                     | 0.0298  |
| RD22                     | 0.461   | RD22                     | 0.0015  | RD22                     | 0.0136  | RD22                      | 0.0026  | RD22                    | 0.00144  | RD22                     | 0.0854  |
| RD23                     | 0.0126  | RD23                     | 0.0145  | RD23                     | 0.0309  | RD23                      | 0.0025  | RD23                    | 0.00016  | RD23                     | 0.0656  |
| RD24                     | 0.0423  | RD24                     | 0.0307  | RD24                     | 0.0436  | RD24                      | 0.0124  | RD24                    | 0.00176  | RD24                     | 0.112   |
| RD25                     | 0.00527 | RD25                     | 0.00515 | RD25                     | 0.0685  | RD25                      | 0.0020  | RD25                    | 0.00026  | RD25                     | 0.301   |
| RD26                     | 0.152   | RD26                     | 0.00164 | RD26                     | 0.0091  | RD26                      | 0.0067  | RD26                    | 9.32E-05 | RD26                     | 0.0229  |
| RD27                     | 0.00030 | RD27                     | 0.0787  | RD27                     | 0.0249  | RD27                      | 0.0002  | RD27                    | 0.00063  | RD27                     | 0.0654  |
| RD28                     | 0.00897 | RD28                     | 0.0103  | RD28                     | 0.0148  | RD28                      | 0.018   | RD28                    | 0.000298 | RD28                     | 0.0554  |
| RD29                     | 0.00309 | RD29                     | 0.00539 | RD29                     | 0.0137  | RD29                      | 0.0037  | RD29                    | 0.00123  | RD29                     | 0.0652  |
| RD30                     | 0.00138 | RD30                     | 0.022   | RD30                     | 0.0194  | RD30                      | 0.0054  | RD30                    | 0.000988 | RD30                     | 0.0554  |
| RD31                     | 0.217   | RD31                     | 0.0273  | RD31                     | 0.0487  | RD31                      | 0.0042  | RD31                    | 5.05E-05 | RD31                     | 0.00121 |
| RD32                     | 0.00787 | RD32                     | 0.00816 | RD32                     | 0.0072  | RD32                      | 0.0089  | RD32                    | 0.000231 | RD32                     | 0.00858 |
| RD33                     | 0.0126  | RD33                     | 0.0209  | RD33                     | 0.0228  | RD33                      | 0.0007  | RD33                    | 0.00144  | RD33                     | 0.0794  |
| RD34                     | 0.0221  | RD34                     | 0.00465 | RD34                     | 0.0099  | RD34                      | 0.0013  | RD34                    | 0.00137  | RD34                     | 0.0368  |
| RD35                     | 0.122   | RD35                     | 0.0108  | RD35                     | 0.0011  | RD35                      | 0.0062  | RD35                    | 0.00235  | RD35                     | 0.00856 |
| RD36                     | 0.099   | RD36                     | 0.00314 | RD36                     | 0.0791  | RD36                      | 0.0132  | RD36                    | 0.00106  | RD36                     | 0.0935  |
| RD37                     | 0.152   | RD37                     | 0.0189  | RD37                     | 0.0362  | RD37                      | 0.0027  | RD37                    | 0.00068  | RD37                     | 0.147   |
| RD38                     | 0.0326  | RD38                     | 0.0146  | RD38                     | 0.0061  | RD38                      | 0.0065  | RD38                    | 0.00781  | RD38                     | 0.0282  |

|       |                      |       |         |       |        |       |        |       |                       |       |         |
|-------|----------------------|-------|---------|-------|--------|-------|--------|-------|-----------------------|-------|---------|
| RD39  | 0.0526               | RD39  | 0.00822 | RD39  | 0.0304 | RD39  | 0.0021 | RD39  | 0.000173              | RD39  | 0.149   |
| RD40  | 0.186                | RD40  | 0.0524  | RD40  | 0.0263 | RD40  | 0.0019 | RD40  | 0.00073               | RD40  | 0.26    |
| RD41  | 0.0105               | RD41  | 0.0139  | RD41  | 0.0427 | RD41  | 0.0148 | RD41  | 0.00412               | RD41  | 0.0742  |
| RD42  | 0.00244              | RD42  | 0.04    | RD42  | 0.0155 | RD42  | 0.0007 | RD42  | 0.00168               | RD42  | 0.0837  |
| RD43  | 0.0472               | RD43  | 0.00748 | RD43  | 0.0258 | RD43  | 0.0004 | RD43  | 0.00181               | RD43  | 0.0787  |
| RD44  | 0.0113               | RD44  | 0.00345 | RD44  | 0.233  | RD44  | 0.0031 | RD44  | 0.000207              | RD44  | 0.116   |
| RD45  | 0.0128               | RD45  | 0.00093 | RD45  | 0.0194 | RD45  | 0.0052 | RD45  | 0.000893              | RD45  | 0.0347  |
| RD46  | 0.0407               | RD46  | 0.0269  | RD46  | 0.0161 | RD46  | 0.0134 | RD46  | 0.00128               | RD46  | 0.0448  |
| RD47  | 0.107                | RD47  | 0.0318  | RD47  | 0.0145 | RD47  | 0.0054 | RD47  | 0.00109               | RD47  | 0.00793 |
| RD48  | 0.0115               | RD48  | 0.053   | RD48  | 0.0462 | RD48  | 0.0041 | RD48  | 0.001                 | RD48  | 0.149   |
| RD49  | 0.299                | RD49  | 0.00227 | RD49  | 0.156  | RD49  | 0.0002 | RD49  | 0.00035               | RD49  | 0.0487  |
| RD50  | 0.0386               | RD50  | 0.00335 | RD50  | 0.0019 | RD50  | 0.0025 | RD50  | 0.000955              | RD50  | 0.0121  |
| RD51  | 0.0219               | RD51  | 0.00273 | RD51  | 0.0265 | RD51  | 0.0066 | RD51  | 0.00063               | RD51  | 0.00181 |
| RD52  | 0.00081              | RD52  | 0.013   | RD52  | 0.0591 | RD52  | 0.0009 | RD52  | 0.00363               | RD52  | 0.0091  |
| RD53  | 0.466                | RD53  | 0.0286  | RD53  | 0.0718 | RD53  | 0.0022 | RD53  | 0.000374              | RD53  | 0.0136  |
| RD54  | 0.0477               | RD54  | 0.00263 | RD54  | 0.0039 | RD54  | 0.0042 | RD54  | 0.00479               | RD54  | 0.0285  |
| RD55  | 0.0257               | RD55  | 0.00196 | RD55  | 0.0001 | RD55  | 0.0012 | RD55  | 0.00167               | RD55  | 0.0368  |
| RD56  | 0.037                | RD56  | 0.0115  | RD56  | 0.0289 | RD56  | 0.0004 | RD56  | 0.00554               | RD56  | 0.0199  |
| RD57  | 0.0619               | RD57  | 0.014   | RD57  | 0.0864 | RD57  | 0.0053 | RD57  | 0.00174               | RD57  | 0.0489  |
| RD58  | $7.7 \times 10^{-5}$ | RD58  | 0.00717 | RD58  | 0.0005 | RD58  | 0.0009 | RD58  | 0.00317               | RD58  | 0.173   |
| RD59  | 0.0207               | RD59  | 0.00122 | RD59  | 0.0066 | RD59  | 0.0072 | RD59  | 0.00043               | RD59  | 0.0163  |
| RD60  | 0.0193               | RD60  | 0.00388 | RD60  | 0.0255 | RD60  | 0.0022 | RD60  | 0.00576               | RD60  | 0.0231  |
| RD61  | 0.125                | RD61  | 0.0272  | RD61  | 0.308  | RD61  | 0.0022 | RD61  | 0.00159               | RD61  | 0.00428 |
| RD62  | 0.00912              | RD62  | 0.018   | RD62  | 0.0089 | RD62  | 0.0015 | RD62  | 0.00281               | RD62  | 0.074   |
| RD63  | 0.162                | RD63  | 0.0068  | RD63  | 0.0961 | RD63  | 0.01   | RD63  | 0.000417              | RD63  | 0.228   |
| RD64  | 0.0195               | RD64  | 0.00214 | RD64  | 0.0064 | RD64  | 0.0128 | RD64  | 0.000216              | RD64  | 0.0398  |
| RD65  | 0.0017               | RD65  | 0.0086  | RD65  | 0.0058 | RD65  | 0.0072 | RD65  | 0.00569               | RD65  | 0.0338  |
| RD66  | 0.095                | RD66  | 0.0116  | RD66  | 0.0091 | RD66  | 0.0012 | RD66  | 0.00552               | RD66  | 0.0114  |
| RD67  | 0.0193               | RD67  | 0.00388 | RD67  | 0.0273 | RD67  | 0.0027 | RD67  | 0.000123              | RD67  | 0.014   |
| RD68  | 0.0145               | RD68  | 0.00701 | RD68  | 0.0022 | RD68  | 0.0019 | RD68  | 0.000233              | RD68  | 0.017   |
| RD69  | 0.0534               | RD69  | 0.00036 | RD69  | 0.0534 | RD69  | 0.0176 | RD69  | 0.0108                | RD69  | 0.0273  |
| RD70  | 0.00709              | RD70  | 0.0691  | RD70  | 0.033  | RD70  | 0.0006 | RD70  | $5.16 \times 10^{-5}$ | RD70  | 0.0831  |
| RD71  | 0.258                | RD71  | 0.0315  | RD71  | 0.0258 | RD71  | 0.0011 | RD71  | 0.000983              | RD71  | 0.0583  |
| RD72  | 0.00365              | RD72  | 0.00234 | RD72  | 0.068  | RD72  | 0.0027 | RD72  | $9.04 \times 10^{-5}$ | RD72  | 0.09    |
| RD73  | 0.147                | RD73  | 0.00070 | RD73  | 0.0089 | RD73  | 0.0033 | RD73  | 0.00135               | RD73  | 0.0501  |
| RD74  | 0.00462              | RD74  | 0.00849 | RD74  | 0.0432 | RD74  | 0.0035 | RD74  | 0.00102               | RD74  | 0.0865  |
| RD75  | 0.0244               | RD75  | 0.00787 | RD75  | 0.0266 | RD75  | 0.0042 | RD75  | 0.00527               | RD75  | 0.0581  |
| RD76  | 0.0251               | RD76  | 0.00907 | RD76  | 0.0060 | RD76  | 0.0006 | RD76  | 0.000342              | RD76  | 0.00963 |
| RD77  | 0.0219               | RD77  | 0.00663 | RD77  | 0.0041 | RD77  | 0.0012 | RD77  | 0.00084               | RD77  | 0.0398  |
| RD78  | 0.0318               | RD78  | 0.00403 | RD78  | 0.0184 | RD78  | 0.021  | RD78  | 0.000249              | RD78  | 0.0646  |
| RD79  | 0.163                | RD79  | 0.0142  | RD79  | 0.102  | RD79  | 0.0076 | RD79  | 0.00226               | RD79  | 0.0324  |
| RD80  | 0.0174               | RD80  | 0.00122 | RD80  | 0.0163 | RD80  | 0.0044 | RD80  | 0.00419               | RD80  | 0.0921  |
| RD81  | 0.00195              | RD81  | 0.0326  | RD81  | 0.0033 | RD81  | 0.0108 | RD81  | 0.00161               | RD81  | 0.0217  |
| RD82  | 0.0607               | RD82  | 0.00862 | RD82  | 0.0001 | RD82  | 0.0084 | RD82  | 0.00029               | RD82  | 0.244   |
| RD83  | 0.0128               | RD83  | 0.00719 | RD83  | 0.0206 | RD83  | 0.0022 | RD83  | 0.00116               | RD83  | 0.0253  |
| RD84  | 0.0267               | RD84  | 0.00204 | RD84  | 0.0379 | RD84  | 0.0068 | RD84  | 0.0167                | RD84  | 0.108   |
| RD85  | 0.0338               | RD85  | 0.0106  | RD85  | 0.0293 | RD85  | 0.0011 | RD85  | 0.0056                | RD85  | 0.0837  |
| RD86  | 0.054                | RD86  | 0.00083 | RD86  | 0.0121 | RD86  | 0.0019 | RD86  | 0.000446              | RD86  | 0.122   |
| RD87  | 0.0229               | RD87  | 0.00087 | RD87  | 0.234  | RD87  | 0.0012 | RD87  | 0.000428              | RD87  | 0.0351  |
| RD88  | 0.0158               | RD88  | 0.0346  | RD88  | 0.0547 | RD88  | 0.0028 | RD88  | 0.000138              | RD88  | 0.0774  |
| RD89  | 0.116                | RD89  | 0.00251 | RD89  | 0.0152 | RD89  | 0.0067 | RD89  | 0.000104              | RD89  | 0.122   |
| RD90  | 0.0552               | RD90  | 0.0151  | RD90  | 0.0197 | RD90  | 0.0094 | RD90  | $8.2 \times 10^{-5}$  | RD90  | 0.0488  |
| RD91  | 0.0008               | RD91  | 0.0161  | RD91  | 0.0002 | RD91  | 0.0034 | RD91  | $8.5 \times 10^{-6}$  | RD91  | 0.0854  |
| RD92  | 0.00098              | RD92  | 0.0205  | RD92  | 0.0048 | RD92  | 0.0034 | RD92  | 0.0181                | RD92  | 0.0553  |
| RD93  | 0.947                | RD93  | 0.00303 | RD93  | 0.033  | RD93  | 0.0018 | RD93  | 0.0008                | RD93  | 0.00563 |
| RD94  | 0.0155               | RD94  | 0.017   | RD94  | 0.0098 | RD94  | 0.0020 | RD94  | 0.0019                | RD94  | 0.133   |
| RD95  | 0.00825              | RD95  | 0.00136 | RD95  | 0.0062 | RD95  | 0.0002 | RD95  | 0.0005                | RD95  | 0.00998 |
| RD96  | 0.0622               | RD96  | 0.0607  | RD96  | 0.0124 | RD96  | 0.018  | RD96  | 0.0050                | RD96  | 0.00568 |
| RD97  | 0.00209              | RD97  | 0.0147  | RD97  | 0.0017 | RD97  | 0.0029 | RD97  | 0.0051                | RD97  | 0.0393  |
| RD98  | 0.0289               | RD98  | 0.0259  | RD98  | 0.0202 | RD98  | 0.0051 | RD98  | 0.0106                | RD98  | 0.0174  |
| RD99  | 0.197                | RD99  | 0.00433 | RD99  | 0.0053 | RD99  | 0.0003 | RD99  | 0.0014                | RD99  | 0.0192  |
| RD100 | 0.00804              | RD100 | 0.0488  | RD100 | 0.0463 | RD100 | 0.0035 | RD100 | 0.0019                | RD100 | 0.0583  |
